# Supplementary material for: Conduction velocity along a key white matter tract is associated with autobiographical memory recall ability
Source: eLife. 2022 Sep 27;11:e79303. doi: 10.7554/eLife.79303 (PMC9514844; doi:10.7554/eLife.79303)
Supplement: Figure 5—source data 1. [file elife-79303-fig5-data1.xlsx]

## Sheet: g-ratio Fig 5
	Basic demographic information			Autobiographical memory recall ability and control measure		Microstructure data from the parahippocampal cingulum bundle ROI			Data used in Figure 5 to plot the partial correlations with age, gender, scanner and the number of voxels in the ROI as covariates
Participant Number	Sex (1=Male, 2=Female)	Scanner (1, 2, 3)	Age (years)	Mean number internal details per memory	Mean number external details per memory	Number of voxels in the parahippocampal cingulum bundle ROI	Parahippocampal cingulum bundle (weighted) mean MR g-ratio		Internal details residuals	External details residuals	Parahippocampal cingulum bundle (weighted) mean MR g-ratio residuals
1	1	1	27	21.2	4.6	148	0.685421		-0.31031	-0.11688	0.77897
2	1	1	30	22.2	6.6	121	0.636639		-0.08013	0.37326	-0.37449
3	2	1	23	14.2	5.2	107	0.655607		-1.29727	0.28433	0.13455
4	2	2	29	34.2	3.8	140	0.654449		1.26291	-0.45557	0.14381
5	2	1	38	22.4	8.8	175	0.630476		-0.58067	0.8183	-0.6953
6	1	3	31	23.2	11.2	130	0.644221		-0.03357	1.69937	0.05927
7	1	3	30	27.6	4.2	132	0.676941		0.57708	-0.48807	0.8377
8	1	2	37	37	7.6	154	0.662832		1.74971	0.35503	0.26627
9	2	3	32	27	8.6	125	0.644309		0.28044	0.88353	0.0245
10	1	2	23	31.2	11	146	0.605121		1.09811	2.04645	-0.92292
11	2	3	31	22.2	14.2	115	0.638892		-0.33412	2.70702	-0.08137
12	1	2	33	32.4	6.4	148	0.702752		1.17108	0.14352	1.25608
13	1	3	36	23.6	1.2	124	0.557872		0.00545	-1.712	-2.02109
14	1	1	32	31.4	6.6	153	0.644014		1.04153	0.30542	-0.25617
15	1	2	27	30.8	7	130	0.67116		1.07785	0.58615	0.59993
16	2	3	21	19.2	10	85	0.666212		-0.53579	1.78639	0.70474
17	2	3	27	24	3.4	117	0.634176		-0.05892	-0.56113	-0.14873
18	1	1	20	20	4.2	115	0.625418		-0.27461	0.04137	-0.51847
19	1	3	21	15.4	3	143	0.669784		-1.08766	-0.47057	0.76071
20	1	2	30	17.8	6.6	124	0.599577		-0.72632	0.32376	-1.11064
21	2	2	38	16.4	5.2	136	0.65994		-1.26721	-0.405	0.17457
22	1	1	22	22.6	3.6	90	0.595573		0.17752	-0.25272	-1.21748
23	2	2	35	23.6	8	80	0.659054		0.00013	0.58481	0.24435
24	1	2	24	28.4	2.4	114	0.692796		0.83941	-0.75949	1.15871
25	2	2	40	23.2	2	119	0.669711		-0.26666	-1.52335	0.39864
26	1	2	30	21.2	7.8	124	0.61134		-0.25434	0.70645	-0.83414
27	2	2	22	28.2	5	69	0.559474		0.79674	0.18966	-1.93729
28	2	2	32	37	3.2	137	0.666255		1.6391	-0.77991	0.39021
29	2	3	31	24.4	6.2	184	0.51683		-0.32733	0.19799	-3.01991
30	2	3	31	20.6	5.8	137	0.62442		-0.65144	0.04164	-0.4437
31	2	1	36	28.6	4	171	0.641297		0.31431	-0.62748	-0.41419
32	1	1	31	23.6	5.6	157	0.620142		-0.05008	0.03268	-0.80993
33	2	1	22	34.6	6.2	131	0.680614		1.43926	0.66166	0.70948
34	1	1	23	14.4	2.2	111	0.618982		-1.06017	-0.73006	-0.69983
35	2	2	30	36	11.2	138	0.66777		1.51295	1.85943	0.44756
36	2	2	38	34.2	5.4	168	0.680082		1.06528	-0.32162	0.61571
37	2	3	33	28.2	3.4	157	0.60832		0.30004	-0.79893	-0.86503
38	1	2	32	14.6	1	166	0.612279		-1.3693	-1.52385	-0.87717
39	1	3	24	19.2	3.2	105	0.653642		-0.42118	-0.56121	0.38551
40	2	3	28	30.4	2.6	130	0.651413		0.76477	-0.85201	0.23192
41	2	2	33	21.6	7.6	153	0.641749		-0.57645	0.58938	-0.21328
42	2	1	31	22.8	3.4	154	0.701364		-0.3748	-0.61066	1.07165
43	2	1	28	32.8	1.6	58	0.66768		1.45435	-1.11234	0.41087
44	2	2	25	32.4	1.6	112	0.698673		1.1682	-0.99946	1.25699
45	2	2	31	28.4	4.6	147	0.69251		0.41048	-0.28359	1.0086
46	2	1	33	25.4	1.2	163	0.640222		-0.06981	-1.39418	-0.39727
47	1	3	36	44	8.4	141	0.671475		2.76379	0.59457	0.6319
48	2	2	26	24.8	1.6	112	0.662373		0.10468	-1.04317	0.39242
49	2	3	26	16.6	1.6	146	0.648602		-1.20319	-1.07369	0.17246
50	1	2	33	16.4	3.2	83	0.65652		-0.76871	-0.91679	0.23501
51	1	2	21	29.2	2.6	80	0.548312		1.1231	-0.58538	-2.16884
52	2	1	22	18.8	5	107	0.678632		-0.65021	0.26427	0.68709
53	2	1	21	21	2	120	0.703787		-0.39257	-0.64079	1.27659
54	1	1	28	16.8	3.4	149	0.562214		-0.93394	-0.54268	-2.12929
55	1	3	27	26	14.2	125	0.565401		0.41075	2.82791	-1.7428
56	2	3	32	27.6	4.8	95	0.711376		0.49357	-0.34671	1.63113
57	1	2	38	19.6	2.6	134	0.666082		-0.58768	-1.29549	0.35146
58	1	1	20	12.4	7	133	0.673301		-1.40754	0.94534	0.58882
59	1	1	27	16.4	3.8	92	0.692424		-0.73428	-0.4063	1.00005
60	2	2	23	24.2	2.6	139	0.604271		-0.06998	-0.57658	-0.96635
61	1	1	31	26.4	12.6	115	0.614986		0.52039	2.23933	-0.88874
62	2	3	24	19.6	14.4	103	0.607266		-0.58365	3.06947	-0.73299
63	2	3	22	22	4.2	122	0.656572		-0.31572	-0.08435	0.42946
64	1	3	28	38.2	7.4	155	0.579391		1.96601	0.63397	-1.45561
65	1	3	21	26.4	1.8	79	0.637858		0.71632	-0.89246	0.07487
66	2	1	31	21	7.4	112	0.660482		-0.4429	0.63926	0.1531
67	1	2	35	18.4	5.2	180	0.643534		-0.92786	-0.30701	-0.1908
68	1	2	27	29.4	11.2	114	0.654359		0.95274	1.91577	0.22118
69	2	3	37	25.8	1.6	141	0.641142		0.00214	-1.55763	-0.12292
70	1	2	22	18.8	4.6	133	0.620147		-0.55849	0.04118	-0.54527
71	2	2	28	20.8	2.2	134	0.63768		-0.5628	-0.92579	-0.23291
72	2	1	32	24.4	10	140	0.618236		-0.10059	1.44186	-0.87947
73	2	3	28	29.2	11.2	156	0.586234		0.48566	1.90654	-1.32629
74	2	3	29	28.2	5.6	155	0.658937		0.34267	0.07631	0.37218
75	1	2	32	25	7.6	112	0.655625		0.30812	0.54789	0.19609
76	2	3	23	26.4	1.4	125	0.677839		0.27361	-1.01918	0.91494
77	2	3	33	19.2	7.8	179	0.65334		-1.04454	0.61775	0.17094
78	2	1	37	21	5.2	144	0.673516		-0.63236	-0.30504	0.35897
79	2	3	38	30	1.4	109	0.675305		0.71517	-1.68473	0.70096
80	2	1	35	22.8	10.4	145	0.679328		-0.36983	1.44134	0.5173
81	2	1	29	17.2	1.4	158	0.566088		-1.1525	-1.1586	-2.0892
82	2	1	39	19.2	4.8	80	0.627068		-0.62225	-0.55923	-0.69095
83	2	2	33	23	9.8	163	0.663318		-0.42538	1.29711	0.2836
84	1	3	29	24	3.4	131	0.670093		0.09015	-0.70009	0.68911
85	1	3	37	15	5	126	0.652626		-1.20554	-0.54263	0.19263
86	1	2	23	15.2	6.8	131	0.690621		-1.05808	0.69784	1.10182
87	2	1	20	14.4	2.2	128	0.694274		-1.33491	-0.52839	1.05631
88	2	2	33	29.8	4.6	153	0.61492		0.56187	-0.36735	-0.84389
89	2	2	21	28.2	1.2	135	0.639225		0.5196	-0.93807	-0.11799
90	2	1	34	17.8	1.8	101	0.597926		-0.865	-1.28452	-1.34025
91	2	3	32	17.4	4.2	99	0.598299		-0.9397	-0.5356	-1.0307
92	2	1	28	29.4	6.6	134	0.699496		0.65345	0.52876	1.08202
93	2	3	22	16.2	4.2	40	0.573757		-0.76599	-0.13457	-1.43431
94	2	2	20	20.2	2.6	108	0.657614		-0.46561	-0.46441	0.35281
95	1	3	35	26.6	6.8	167	0.666354		0.24431	0.14395	0.4967
96	1	3	24	16	8	107	0.612603		-0.87406	0.97079	-0.58108
97	2	2	21	27.8	3.8	81	0.692349		0.69777	-0.14197	1.1851
98	1	1	28	10.2	2	139	0.621343		-1.80686	-0.99527	-0.72942
99	2	1	27	24	2.2	87	0.667213		0.11573	-0.85951	0.38202
100	1	2	26	18	3.8	116	0.680308		-0.62995	-0.39922	0.84045
101	1	1	33	25.6	10.8	149	0.683887		0.24519	1.59868	0.67367
102	1	1	21	15.8	3	97	0.625374		-0.78824	-0.39607	-0.51272
103	1	2	28	26.8	4	134	0.691774		0.49676	-0.41185	1.06905
104	2	1	31	38.4	4.4	137	0.606556		1.86435	-0.30216	-1.1396
105	1	2	36	13.4	3.2	152	0.654763		-1.50927	-1.00569	0.09
106	1	1	32	22	4.2	115	0.577141		-0.09891	-0.48323	-1.78963
107	2	1	30	16.6	4.2	165	0.642806		-1.27459	-0.30508	-0.30444
108	1	3	28	31.6	5.6	163	0.655479		1.01518	0.06483	0.32472
109	1	1	24	26.6	4.2	128	0.674216		0.55135	-0.12554	0.56988
110	2	3	26	22.6	5.2	124	0.629889		-0.27506	0.06092	-0.2452
111	1	2	34	35.6	5.4	158	0.631962		1.56353	-0.21298	-0.42923
112	1	2	26	21.4	4.2	133	0.670205		-0.23154	-0.26125	0.58583
113	1	2	33	25.4	13.2	145	0.693867		0.21234	2.31028	1.05028
114	2	1	23	39.8	8.6	121	0.648611		2.1959	1.3772	-0.04403
115	2	1	31	24	4.6	150	0.674717		-0.1909	-0.23042	0.44936
116	1	3	28	20.2	9.2	115	0.661604		-0.35962	1.18351	0.51709
117	1	2	20	25.6	0.8	123	0.690975		0.44575	-1.08937	1.15233
118	2	1	31	33.6	11.6	140	0.645334		1.18504	1.99584	-0.23116
119	1	1	34	19.6	3.6	164	0.59421		-0.66113	-0.73201	-1.46062
120	2	3	20	22.4	4.4	121	0.678033		-0.23887	0.06625	0.95765
121	2	3	20	21.6	2	132	0.644739		-0.39754	-0.6924	0.164
122	1	2	26	37.8	2	119	0.673242		2.10568	-0.97143	0.67133
123	2	2	36	25	17.4	41	0.638144		0.35477	3.51497	-0.21915
124	2	3	31	13.8	5.4	144	0.539654		-1.6257	-0.08164	-2.44312
125	1	3	29	22	7.8	153	0.647853		-0.2827	0.71659	0.14419
126	1	3	28	14.8	2	92	0.651817		-1.0097	-1.12673	0.31025
127	2	2	31	21.8	6.6	137	0.595448		-0.46245	0.34811	-1.26266
128	1	2	37	16.8	3	164	0.648071		-1.09772	-1.10584	-0.09077
129	2	2	20	15.8	2.8	101	0.667262		-1.04612	-0.40492	0.58664
130	2	3	31	24.2	9.2	136	0.608162		-0.14736	1.12533	-0.82483
131	2	2	20	26.8	4.6	132	0.647268		0.34673	0.18811	0.08544
132	1	3	24	10.2	2	115	0.686045		-1.71383	-0.93778	1.13703
133	2	1	21	28.6	2	128	0.653751		0.62783	-0.63589	0.09247
134	2	2	23	27.2	10.2	121	0.65604		0.42438	1.83612	0.2686
135	2	1	30	37.4	3.8	135	0.696468		1.74268	-0.45101	0.9871
136	1	3	41	22	10.4	162	0.690721		-0.42359	1.02667	1.00624
137	1	3	34	28.2	7.8	120	0.542689		0.67832	0.4778	-2.35119
138	2	3	25	15.2	7.2	110	0.510969		-1.23324	0.73388	-3.01482
139	1	1	33	21.2	3.4	166	0.585752		-0.43918	-0.75085	-1.65006
140	2	1	35	19.4	8.2	129	0.674607		-0.77257	0.72994	0.42248
141	2	2	34	17.8	3	130	0.671742		-1.01292	-0.93541	0.5035
142	2	3	20	15.4	2	99	0.670058		-1.1154	-0.71261	0.7924
143	1	1	30	25.2	14.4	143	0.676463		0.24112	2.87424	0.53935
144	1	3	31	32	2	140	0.677988		1.14476	-1.22849	0.84285
145	2	3	21	17.8	3	91	0.649901		-0.7561	-0.44231	0.31531
146	2	2	28	21.2	2	149	0.636979		-0.57219	-0.98038	-0.26451
147	2	2	26	43.2	7	111	0.637228		2.66327	0.67833	-0.19759
148	1	1	21	11.2	4.8	93	0.389146		-1.4095	0.17552	-6.06103
149	2	3	36	14.4	2.2	137	0.601866		-1.55459	-1.32502	-1.03067
150	2	1	21	27.2	2.4	106	0.694405		0.52869	-0.5218	1.0702
151	1	2	40	18	6.2	86	0.684814		-0.61905	-0.26424	0.81741
152	2	3	35	19.6	4.2	139	0.665138		-0.83289	-0.64226	0.46585
153	2	2	24	31.8	6.2	128	0.674273		1.02416	0.52105	0.67872
154	1	3	25	15.6	6.2	87	0.613848		-0.85152	0.34078	-0.54301
155	1	2	21	22.2	2.8	123	0.644096		-0.03473	-0.49527	0.03911
156	1	1	28	13	4.2	115	0.67967		-1.3143	-0.30837	0.6657
157	1	2	31	22.2	7.2	122	0.604485		-0.11536	0.47016	-1.00461
158	2	1	25	23	9.6	161	0.635458		-0.32636	1.63317	-0.41626
159	1	3	33	22	8.8	132	0.696172		-0.22579	0.84777	1.25559
160	1	2	33	28	7.6	143	0.650945		0.58192	0.52316	0.04346
161	2	1	32	25.4	1	140	0.685049		0.03823	-1.42833	0.69093
162	1	3	20	25.6	6.4	124	0.598133		0.41901	0.6458	-0.89285
163	1	3	29	21.4	5.8	154	0.657161		-0.37032	0.07938	0.36195
164	2	2	37	11.8	3	159	0.664245		-1.99682	-1.0488	0.26394
165	1	1	35	41.8	6.4	161	0.709951		2.42514	0.11539	1.25143
166	2	1	20	4.6	2.6	138	0.619819		-2.73861	-0.3947	-0.70379
167	1	2	24	22.8	4.2	139	0.592568		-0.04617	-0.17014	-1.22226
168	1	3	32	37.6	7.8	129	0.635102		1.96126	0.57074	-0.16541
169	2	1	29	30	9.4	147	0.645271		0.67198	1.38595	-0.21696
170	1	3	32	16.8	7.4	120	0.652804		-0.88722	0.43767	0.25973
171	2	3	35	30.2	8.4	163	0.590718		0.53472	0.71186	-1.30754
172	1	3	37	18.8	3.4	126	0.682265		-0.67803	-1.05288	0.88928
173	2	3	25	29.8	1.8	120	0.704116		0.75024	-0.98211	1.51486
174	1	1	25	27.6	3.8	127	0.719822		0.686	-0.29743	1.63145
175	1	3	37	25.8	4	149	0.641753		0.19417	-0.84745	-0.08612
176	2	3	28	13.8	2.8	127	0.684387		-1.52664	-0.79007	1.00998
177	1	1	24	16.2	6.2	118	0.68665		-0.84909	0.50616	0.87223
178	1	1	31	34	4.6	154	0.663236		1.40662	-0.28807	0.20599
179	1	2	27	23.4	6.4	96	0.672337		0.19773	0.37398	0.66189
180	1	2	23	15.2	1.2	133	0.645413		-1.06673	-1.08683	0.03722
181	2	2	22	33.4	0.8	149	0.679857		1.17237	-1.10078	0.81153
182	1	3	35	14.4	5.4	107	0.66787		-1.18961	-0.33926	0.59283
183	2	1	23	25.8	2.2	113	0.68823		0.28706	-0.66873	0.89527
184	2	3	27	24.4	5.8	106	0.550761		0.04422	0.19752	-2.09824
185	2	3	32	35.2	13	148	0.649663		1.31922	2.30082	0.12715
186	2	1	37	18	10.4	129	0.581139		-0.9839	1.34411	-1.79716
187	2	2	33	18.2	0.8	140	0.681801		-0.99217	-1.58717	0.74121
188	1	1	31	22.8	8	129	0.653677		-0.03995	0.78092	0.00653
189	1	3	28	25.4	7	151	0.651703		0.20644	0.50395	0.24807
190	1	1	39	31.4	5.4	117	0.71181		1.13786	-0.40533	1.29403
191	1	3	35	19.8	7.2	91	0.656998		-0.37075	0.22498	0.35343
192	1	1	31	10.6	5.6	158	0.639772		-1.85905	0.03329	-0.34956
193	1	3	24	38.4	5.8	95	0.665312		2.28742	0.26183	0.6699
194	1	1	38	17	8.4	145	0.659707		-0.97381	0.61226	0.05253
195	1	1	39	18.4	1.8	141	0.664392		-0.77065	-1.53871	0.1553
196	2	3	31	35.8	9	161	0.653981		1.35474	1.07685	0.22689
197	2	1	22	44.6	6.4	119	0.688704		2.87939	0.71809	0.91174
198	1	3	30	18.2	2.4	132	0.693488		-0.72782	-1.0621	1.22662
199	1	3	23	18	2.2	139	0.586713		-0.72641	-0.81558	-1.21052
200	2	2	35	24.2	3.6	114	0.688574		-0.06372	-0.79757	0.90388
201	1	1	28	30.6	3.4	156	0.644933		0.95147	-0.53839	-0.19212
202	1	1	20	21.8	3.8	115	0.657941		-0.02474	-0.0862	0.24594
203	1	1	29	17	5.8	116	0.680437		-0.77185	0.15879	0.67134
204	2	2	35	28	3	171	0.643838		0.2171	-0.95402	-0.20508
205	1	3	30	28.6	3.4	27	0.604032		1.17032	-0.80749	-0.77008
206	2	2	21	32.2	2.6	142	0.672437		1.04458	-0.48731	0.65555
207	1	1	27	18.4	3.4	167	0.654696		-0.78123	-0.48794	0.03764
208	1	2	21	23	2.8	125	0.680087		0.06767	-0.49404	0.88303
209	2	3	37	28.6	4.8	164	0.687137		0.29129	-0.52303	0.93495
210	1	2	31	36.4	7.2	130	0.654503		1.82125	0.47506	0.16294
211	2	3	23	27	7.2	140	0.67985		0.29198	0.83969	0.94708
212	1	2	28	30.8	3	133	0.635998		1.05637	-0.73137	-0.24091
213	1	1	36	34.8	11.2	145	0.680944		1.51416	1.59265	0.57441
214	2	3	20	16.6	2.2	125	0.606914		-1.06134	-0.6329	-0.71799
215	1	1	34	15.4	4.2	143	0.663715		-1.15329	-0.55352	0.19422
216	2	2	40	34.8	12.2	141	0.659944		1.24843	1.74301	0.14687
217	1	2	36	23.6	5	127	0.706377		0.01488	-0.44696	1.32837
