# Supplementary material for: Conduction velocity along a key white matter tract is associated with autobiographical memory recall ability
Source: eLife. 2022 Sep 27;11:e79303. doi: 10.7554/eLife.79303 (PMC9514844; doi:10.7554/eLife.79303)
Supplement: Figure 6—source data 1. [file elife-79303-fig6-data1.xlsx]

## Sheet: ODI Fig 6
	Basic demographic information			Autobiographical memory recall ability and control measure		Microstructure data from the parahippocampal cingulum bundle ROI			Data used in Figure 6 to plot the partial correlations with age, gender, scanner and the number of voxels in the ROI as covariates
Participant Number	Sex (1=Male, 2=Female)	Scanner (1, 2, 3)	Age (years)	Mean number internal details per memory	Mean number external details per memory	Number of voxels in the parahippocampal cingulum bundle ROI	Parahippocampal cingulum bundle (weighted) mean orientation dispersion index		Internal details residuals	External details residuals	Parahippocampal cingulum bundle (weighted) mean orientation dispersion index residuals
1	1	1	27	21.2	4.6	148	0.163825		-0.31031	-0.11688	-0.37492
2	1	1	30	22.2	6.6	121	0.206295		-0.08013	0.37326	0.53042
3	2	1	23	14.2	5.2	107	0.163717		-1.29727	0.28433	-0.11183
4	2	2	29	34.2	3.8	140	0.16841		1.26291	-0.45557	-0.23451
5	2	1	38	22.4	8.8	175	0.218862		-0.58067	0.8183	1.63698
6	1	3	31	23.2	11.2	130	0.207027		-0.03357	1.69937	-0.12298
7	1	3	30	27.6	4.2	132	0.175076		0.57708	-0.48807	-1.01571
8	1	2	37	37	7.6	154	0.19421		1.74971	0.35503	-0.12257
9	2	3	32	27	8.6	125	0.152166		0.28044	0.88353	-1.31734
10	1	2	23	31.2	11	146	0.14181		1.09811	2.04645	-1.27075
11	2	3	31	22.2	14.2	115	0.183868		-0.33412	2.70702	-0.43782
12	1	2	33	32.4	6.4	148	0.161621		1.17108	0.14352	-1.00601
13	1	3	36	23.6	1.2	124	0.251744		0.00545	-1.712	0.97456
14	1	1	32	31.4	6.6	153	0.202573		1.04153	0.30542	0.64752
15	1	2	27	30.8	7	130	0.177957		1.07785	0.58615	-0.48494
16	2	3	21	19.2	10	85	0.186791		-0.53579	1.78639	-0.28831
17	2	3	27	24	3.4	117	0.201787		-0.05892	-0.56113	0.24658
18	1	1	20	20	4.2	115	0.201281		-0.27461	0.04137	0.6665
19	1	3	21	15.4	3	143	0.162116		-1.08766	-0.47057	-0.99183
20	1	2	30	17.8	6.6	124	0.25376		-0.72632	0.32376	1.60011
21	2	2	38	16.4	5.2	136	0.227861		-1.26721	-0.405	1.18141
22	1	1	22	22.6	3.6	90	0.256157		0.17752	-0.25272	1.99125
23	2	2	35	23.6	8	80	0.172252		0.00013	0.58481	-0.87812
24	1	2	24	28.4	2.4	114	0.152761		0.83941	-0.75949	-1.27592
25	2	2	40	23.2	2	119	0.171055		-0.26666	-1.52335	-0.72371
26	1	2	30	21.2	7.8	124	0.236139		-0.25434	0.70645	1.07886
27	2	2	22	28.2	5	69	0.168757		0.79674	0.18966	-0.64128
28	2	2	32	37	3.2	137	0.182984		1.6391	-0.77991	0.06701
29	2	3	31	24.4	6.2	184	0.234187		-0.32733	0.19799	1.68705
30	2	3	31	20.6	5.8	137	0.1648		-0.65144	0.04164	-0.79896
31	2	1	36	28.6	4	171	0.179083		0.31431	-0.62748	0.49132
32	1	1	31	23.6	5.6	157	0.188413		-0.05008	0.03268	0.29953
33	2	1	22	34.6	6.2	131	0.163024		1.43926	0.66166	0.12303
34	1	1	23	14.4	2.2	111	0.20281		-1.06017	-0.73006	0.57293
35	2	2	30	36	11.2	138	0.131027		1.51295	1.85943	-1.39276
36	2	2	38	34.2	5.4	168	0.153695		1.06528	-0.32162	-0.71732
37	2	3	33	28.2	3.4	157	0.180645		0.30004	-0.79893	-0.21374
38	1	2	32	14.6	1	166	0.204361		-1.3693	-1.52385	0.45826
39	1	3	24	19.2	3.2	105	0.207306		-0.42118	-0.56121	-0.10747
40	2	3	28	30.4	2.6	130	0.202235		0.76477	-0.85201	0.34574
41	2	2	33	21.6	7.6	153	0.145246		-0.57645	0.58938	-0.93574
42	2	1	31	22.8	3.4	154	0.140887		-0.3748	-0.61066	-0.62545
43	2	1	28	32.8	1.6	58	0.146975		1.45435	-1.11234	-1.22888
44	2	2	25	32.4	1.6	112	0.153193		1.1682	-0.99946	-0.807
45	2	2	31	28.4	4.6	147	0.156505		0.41048	-0.28359	-0.59008
46	2	1	33	25.4	1.2	163	0.133289		-0.06981	-1.39418	-0.83516
47	1	3	36	44	8.4	141	0.170625		2.76379	0.59457	-1.2682
48	2	2	26	24.8	1.6	112	0.167707		0.10468	-1.04317	-0.41164
49	2	3	26	16.6	1.6	146	0.237542		-1.20319	-1.07369	1.60569
50	1	2	33	16.4	3.2	83	0.226166		-0.76871	-0.91679	0.30375
51	1	2	21	29.2	2.6	80	0.26827		1.1231	-0.58538	1.92927
52	2	1	22	18.8	5	107	0.18512		-0.65021	0.26427	0.55529
53	2	1	21	21	2	120	0.105868		-0.39257	-0.64079	-1.6352
54	1	1	28	16.8	3.4	149	0.237091		-0.93394	-0.54268	1.76758
55	1	3	27	26	14.2	125	0.263426		0.41075	2.82791	1.63515
56	2	3	32	27.6	4.8	95	0.19586		0.49357	-0.34671	-0.30153
57	1	2	38	19.6	2.6	134	0.228439		-0.58768	-1.29549	0.67152
58	1	1	20	12.4	7	133	0.161455		-1.40754	0.94534	-0.34557
59	1	1	27	16.4	3.8	92	0.164043		-0.73428	-0.4063	-0.88497
60	2	2	23	24.2	2.6	139	0.166278		-0.06998	-0.57658	-0.10297
61	1	1	31	26.4	12.6	115	0.194061		0.52039	2.23933	0.0792
62	2	3	24	19.6	14.4	103	0.22838		-0.58365	3.06947	1.00603
63	2	3	22	22	4.2	122	0.176254		-0.31572	-0.08435	-0.29271
64	1	3	28	38.2	7.4	155	0.259733		1.96601	0.63397	1.76861
65	1	3	21	26.4	1.8	79	0.239427		0.71632	-0.89246	0.70481
66	2	1	31	21	7.4	112	0.149931		-0.4429	0.63926	-0.74532
67	1	2	35	18.4	5.2	180	0.18654		-0.92786	-0.30701	-0.04169
68	1	2	27	29.4	11.2	114	0.215134		0.95274	1.91577	0.4672
69	2	3	37	25.8	1.6	141	0.179761		0.00214	-1.55763	-0.52336
70	1	2	22	18.8	4.6	133	0.174695		-0.55849	0.04118	-0.38389
71	2	2	28	20.8	2.2	134	0.146293		-0.5628	-0.92579	-0.91012
72	2	1	32	24.4	10	140	0.229095		-0.10059	1.44186	1.8207
73	2	3	28	29.2	11.2	156	0.202185		0.48566	1.90654	0.58408
74	2	3	29	28.2	5.6	155	0.168004		0.34267	0.07631	-0.47021
75	1	2	32	25	7.6	112	0.17762		0.30812	0.54789	-0.83083
76	2	3	23	26.4	1.4	125	0.183448		0.27361	-1.01918	-0.08621
77	2	3	33	19.2	7.8	179	0.191001		-1.04454	0.61775	0.29552
78	2	1	37	21	5.2	144	0.20892		-0.63236	-0.30504	1.09092
79	2	3	38	30	1.4	109	0.166947		0.71517	-1.68473	-1.23154
80	2	1	35	22.8	10.4	145	0.14051		-0.36983	1.44134	-0.85552
81	2	1	29	17.2	1.4	158	0.204584		-1.1525	-1.1586	1.36359
82	2	1	39	19.2	4.8	80	0.184574		-0.62225	-0.55923	-0.2875
83	2	2	33	23	9.8	163	0.212303		-0.42538	1.29711	1.14011
84	1	3	29	24	3.4	131	0.215204		0.09015	-0.70009	0.19609
85	1	3	37	15	5	126	0.218593		-1.20554	-0.54263	-0.02158
86	1	2	23	15.2	6.8	131	0.160237		-1.05808	0.69784	-0.86399
87	2	1	20	14.4	2.2	128	0.15246		-1.33491	-0.52839	-0.1492
88	2	2	33	29.8	4.6	153	0.219018		0.56187	-0.36735	1.24652
89	2	2	21	28.2	1.2	135	0.16509		0.5196	-0.93807	-0.10705
90	2	1	34	17.8	1.8	101	0.246371		-0.865	-1.28452	1.90409
91	2	3	32	17.4	4.2	99	0.214276		-0.9397	-0.5356	0.28011
92	2	1	28	29.4	6.6	134	0.135454		0.65345	0.52876	-0.86872
93	2	3	22	16.2	4.2	40	0.285552		-0.76599	-0.13457	2.1841
94	2	2	20	20.2	2.6	108	0.207973		-0.46561	-0.46441	0.94641
95	1	3	35	26.6	6.8	167	0.178772		0.24431	0.14395	-0.75343
96	1	3	24	16	8	107	0.201856		-0.87406	0.97079	-0.25026
97	2	2	21	27.8	3.8	81	0.1497		0.69777	-0.14197	-1.06035
98	1	1	28	10.2	2	139	0.198928		-1.80686	-0.99527	0.54646
99	2	1	27	24	2.2	87	0.135132		0.11573	-0.85951	-1.27775
100	1	2	26	18	3.8	116	0.179049		-0.62995	-0.39922	-0.54781
101	1	1	33	25.6	10.8	149	0.207313		0.24519	1.59868	0.71685
102	1	1	21	15.8	3	97	0.181074		-0.78824	-0.39607	-0.13123
103	1	2	28	26.8	4	134	0.202519		0.49676	-0.41185	0.24452
104	2	1	31	38.4	4.4	137	0.185636		1.86435	-0.30216	0.54147
105	1	2	36	13.4	3.2	152	0.220756		-1.50927	-1.00569	0.67823
106	1	1	32	22	4.2	115	0.222003		-0.09891	-0.48323	0.87179
107	2	1	30	16.6	4.2	165	0.200938		-1.27459	-0.30508	1.28635
108	1	3	28	31.6	5.6	163	0.178667		1.01518	0.06483	-0.5556
109	1	1	24	26.6	4.2	128	0.139044		0.55135	-0.12554	-1.19052
110	2	3	26	22.6	5.2	124	0.21199		-0.27506	0.06092	0.64692
111	1	2	34	35.6	5.4	158	0.215688		1.56353	-0.21298	0.65158
112	1	2	26	21.4	4.2	133	0.166644		-0.23154	-0.26125	-0.75794
113	1	2	33	25.4	13.2	145	0.196872		0.21234	2.31028	0.00907
114	2	1	23	39.8	8.6	121	0.125306		2.1959	1.3772	-1.11891
115	2	1	31	24	4.6	150	0.145757		-0.1909	-0.23042	-0.51828
116	1	3	28	20.2	9.2	115	0.215336		-0.35962	1.18351	0.08639
117	1	2	20	25.6	0.8	123	0.147784		0.44575	-1.08937	-1.20423
118	2	1	31	33.6	11.6	140	0.155283		1.18504	1.99584	-0.32873
119	1	1	34	19.6	3.6	164	0.197143		-0.66113	-0.73201	0.52038
120	2	3	20	22.4	4.4	121	0.128509		-0.23887	0.06625	-1.64634
121	2	3	20	21.6	2	132	0.182315		-0.39754	-0.6924	0.04677
122	1	2	26	37.8	2	119	0.182472		2.10568	-0.97143	-0.41889
123	2	2	36	25	17.4	41	0.231136		0.35477	3.51497	0.47005
124	2	3	31	13.8	5.4	144	0.262186		-1.6257	-0.08164	2.14635
125	1	3	29	22	7.8	153	0.188782		-0.2827	0.71659	-0.3826
126	1	3	28	14.8	2	92	0.194806		-1.0097	-1.12673	-0.73303
127	2	2	31	21.8	6.6	137	0.165784		-0.46245	0.34811	-0.40783
128	1	2	37	16.8	3	164	0.183065		-1.09772	-1.10584	-0.36002
129	2	2	20	15.8	2.8	101	0.162237		-1.04612	-0.40492	-0.47106
130	2	3	31	24.2	9.2	136	0.23545		-0.14736	1.12533	1.28169
131	2	2	20	26.8	4.6	132	0.179356		0.34673	0.18811	0.32127
132	1	3	24	10.2	2	115	0.174902		-1.71383	-0.93778	-0.97378
133	2	1	21	28.6	2	128	0.162057		0.62783	-0.63589	0.10072
134	2	2	23	27.2	10.2	121	0.167789		0.42438	1.83612	-0.22427
135	2	1	30	37.4	3.8	135	0.152524		1.74268	-0.45101	-0.42249
136	1	3	41	22	10.4	162	0.196535		-0.42359	1.02667	-0.47795
137	1	3	34	28.2	7.8	120	0.249291		0.67832	0.4778	0.93306
138	2	3	25	15.2	7.2	110	0.275927		-1.23324	0.73388	2.44308
139	1	1	33	21.2	3.4	166	0.217329		-0.43918	-0.75085	1.16994
140	2	1	35	19.4	8.2	129	0.182428		-0.77257	0.72994	0.23686
141	2	2	34	17.8	3	130	0.217158		-1.01292	-0.93541	0.94537
142	2	3	20	15.4	2	99	0.144991		-1.1154	-0.71261	-1.36169
143	1	1	30	25.2	14.4	143	0.1398		0.24112	2.87424	-1.23364
144	1	3	31	32	2	140	0.14862		1.14476	-1.22849	-1.75847
145	2	3	21	17.8	3	91	0.226397		-0.7561	-0.44231	0.93861
146	2	2	28	21.2	2	149	0.150442		-0.57219	-0.98038	-0.64906
147	2	2	26	43.2	7	111	0.194259		2.66327	0.67833	0.36457
148	1	1	21	11.2	4.8	93	0.340512		-1.4095	0.17552	4.5482
149	2	3	36	14.4	2.2	137	0.220034		-1.55459	-1.32502	0.66503
150	2	1	21	27.2	2.4	106	0.124592		0.52869	-0.5218	-1.21043
151	1	2	40	18	6.2	86	0.182497		-0.61905	-0.26424	-1.19817
152	2	3	35	19.6	4.2	139	0.212023		-0.83289	-0.64226	0.48047
153	2	2	24	31.8	6.2	128	0.138597		1.02416	0.52105	-1.05723
154	1	3	25	15.6	6.2	87	0.232948		-0.85152	0.34078	0.45103
155	1	2	21	22.2	2.8	123	0.177038		-0.03473	-0.49527	-0.37285
156	1	1	28	13	4.2	115	0.15174		-1.3143	-0.30837	-1.07075
157	1	2	31	22.2	7.2	122	0.325016		-0.11536	0.47016	3.65548
158	2	1	25	23	9.6	161	0.156243		-0.32636	1.63317	0.0972
159	1	3	33	22	8.8	132	0.215764		-0.22579	0.84777	0.08598
160	1	2	33	28	7.6	143	0.229231		0.58192	0.52316	0.94782
161	2	1	32	25.4	1	140	0.116518		0.03823	-1.42833	-1.50942
162	1	3	20	25.6	6.4	124	0.227227		0.41901	0.6458	0.79295
163	1	3	29	21.4	5.8	154	0.137661		-0.37032	0.07938	-1.88557
164	2	2	37	11.8	3	159	0.132072		-1.99682	-1.0488	-1.406
165	1	1	35	41.8	6.4	161	0.184701		2.42514	0.11539	0.09069
166	2	1	20	4.6	2.6	138	0.205294		-2.73861	-0.3947	1.50591
167	1	2	24	22.8	4.2	139	0.192568		-0.04617	-0.17014	0.1322
168	1	3	32	37.6	7.8	129	0.208165		1.96126	0.57074	-0.1325
169	2	1	29	30	9.4	147	0.125637		0.67198	1.38595	-1.07318
170	1	3	32	16.8	7.4	120	0.211327		-0.88722	0.43767	-0.12199
171	2	3	35	30.2	8.4	163	0.205328		0.53472	0.71186	0.50378
172	1	3	37	18.8	3.4	126	0.212438		-0.67803	-1.05288	-0.20366
173	2	3	25	29.8	1.8	120	0.203363		0.75024	-0.98211	0.38882
174	1	1	25	27.6	3.8	127	0.153556		0.686	-0.29743	-0.80443
175	1	3	37	25.8	4	149	0.210659		0.19417	-0.84745	-0.04414
176	2	3	28	13.8	2.8	127	0.213984		-1.52664	-0.79007	0.66564
177	1	1	24	16.2	6.2	118	0.165001		-0.84909	0.50616	-0.5149
178	1	1	31	34	4.6	154	0.172058		1.40662	-0.28807	-0.21194
179	1	2	27	23.4	6.4	96	0.215989		0.19773	0.37398	0.32647
180	1	2	23	15.2	1.2	133	0.133752		-1.06673	-1.08683	-1.62901
181	2	2	22	33.4	0.8	149	0.149543		1.17237	-1.10078	-0.47178
182	1	3	35	14.4	5.4	107	0.204982		-1.18961	-0.33926	-0.5315
183	2	1	23	25.8	2.2	113	0.162793		0.28706	-0.66873	-0.08382
184	2	3	27	24.4	5.8	106	0.269654		0.04422	0.19752	2.15269
185	2	3	32	35.2	13	148	0.153344		1.31922	2.30082	-1.07036
186	2	1	37	18	10.4	129	0.230482		-0.9839	1.34411	1.5904
187	2	2	33	18.2	0.8	140	0.170319		-0.99217	-1.58717	-0.31395
188	1	1	31	22.8	8	129	0.193724		-0.03995	0.78092	0.19837
189	1	3	28	25.4	7	151	0.230164		0.20644	0.50395	0.85705
190	1	1	39	31.4	5.4	117	0.193708		1.13786	-0.40533	-0.18459
191	1	3	35	19.8	7.2	91	0.187642		-0.37075	0.22498	-1.192
192	1	1	31	10.6	5.6	158	0.200746		-1.85905	0.03329	0.67357
193	1	3	24	38.4	5.8	95	0.215878		2.28742	0.26183	0.05386
194	1	1	38	17	8.4	145	0.1818		-0.97381	0.61226	-0.24462
195	1	1	39	18.4	1.8	141	0.198245		-0.77065	-1.53871	0.17097
196	2	3	31	35.8	9	161	0.170132		1.35474	1.07685	-0.41988
197	2	1	22	44.6	6.4	119	0.128457		2.87939	0.71809	-1.01019
198	1	3	30	18.2	2.4	132	0.177285		-0.72782	-1.0621	-0.95034
199	1	3	23	18	2.2	139	0.188108		-0.72641	-0.81558	-0.32779
200	2	2	35	24.2	3.6	114	0.142121		-0.06372	-0.79757	-1.45582
201	1	1	28	30.6	3.4	156	0.185582		0.95147	-0.53839	0.30847
202	1	1	20	21.8	3.8	115	0.145086		-0.02474	-0.0862	-0.99577
203	1	1	29	17	5.8	116	0.125972		-0.77185	0.15879	-1.85775
204	2	2	35	28	3	171	0.163692		0.2171	-0.95402	-0.292
205	1	3	30	28.6	3.4	27	0.262015		1.17032	-0.80749	0.5876
206	2	2	21	32.2	2.6	142	0.190884		1.04458	-0.48731	0.72052
207	1	1	27	18.4	3.4	167	0.198325		-0.78123	-0.48794	0.82085
208	1	2	21	23	2.8	125	0.164173		0.06767	-0.49404	-0.73497
209	2	3	37	28.6	4.8	164	0.167944		0.29129	-0.52303	-0.66077
210	1	2	31	36.4	7.2	130	0.202797		1.82125	0.47506	0.11393
211	2	3	23	27	7.2	140	0.198849		0.29198	0.83969	0.50771
212	1	2	28	30.8	3	133	0.181717		1.05637	-0.73137	-0.38002
213	1	1	36	34.8	11.2	145	0.204274		1.51416	1.59265	0.48813
214	2	3	20	16.6	2.2	125	0.216995		-1.06134	-0.6329	1.00806
215	1	1	34	15.4	4.2	143	0.160125		-1.15329	-0.55352	-0.76833
216	2	2	40	34.8	12.2	141	0.169049		1.24843	1.74301	-0.58014
217	1	2	36	23.6	5	127	0.186213		0.01488	-0.44696	-0.57418
