# Supplementary material for: Conduction velocity along a key white matter tract is associated with autobiographical memory recall ability
Source: eLife. 2022 Sep 27;11:e79303. doi: 10.7554/eLife.79303 (PMC9514844; doi:10.7554/eLife.79303)
Supplement: Supplementary file 1. [file elife-79303-supp1.xlsx]

## Sheet: Fornix_UncinateFasciculus
	Basic demographic information			Autobiographical memory recall ability	Laboratory-based memory tests								Microstructure and standard DTI parameters data from the fornix ROI										Microstructure and standard DTI parameters data from the uncinate fasciculus ROI
Participant Number	Sex (1=Male, 2=Female)	Scanner (1, 2, 3)	Age (years)	Mean number internal details per memory	Mean immediate recall score of the Logical Memory test	Mean dealyed recall score of the Logical Memory test	Mean immediate recall score of the Rey Auditory Verbal Learning Test	Mean dealyed recall score of the Rey Auditory Verbal Learning Test	Mean dealyed recall score of the Rey–Osterrieth Complex Figure	Mean performance on the Warrington Recognition Memory Tests for Words	Mean performance on the Warrington Recognition Memory Tests for Faces	Mean performance on the Dead or Alive Test	Number of voxels in the fornix ROI	Fornix (weighted) mean MR g-ratio	Fornix (weighted) mean magnetisation transfer saturation	Fornix (weighted) mean orientation dispersion index (neurite coherence)	Fornix (weighted) mean neurite density	Fornix (weighted) mean FA	Fornix (weighted) mean MD	Fornix (weighted) mean mean kurtosis	Fornix (weighted) mean Dpara	Fornix (weighted) mean Dperp	Number of voxels in the uncinate fasciculus ROI	Uncinate fasciculus (weighted) mean MR g-ratio	Uncinate fasciculus (weighted) mean magnetisation transfer saturation	Uncinate fasciculus (weighted) mean orientation dispersion index (neurite coherence)	Uncinate fasciculus (weighted) mean neurite density	Uncinate fasciculus (weighted) mean FA	Uncinate fasciculus (weighted) mean MD	Uncinate fasciculus (weighted) mean mean kurtosis	Uncinate fasciculus (weighted) mean Dpara	Uncinate fasciculus (weighted) mean Dperp
1	1	1	27	21.2	12	12	66	14	27	14	7	89.71	264	0.722537	0.973314	0.181389	0.737215	0.590655	0.000959876	1.08324	0.00172016	0.000579733	168	0.749194	0.971477	0.201241	0.630411	0.519028	0.000872043	1.01907	0.00146376	0.000576186
2	1	1	30	22.2	17	17	63	15	28.5	12	5	85	244	0.744538	0.975486	0.122003	0.591519	0.680987	0.000848245	0.926696	0.00167648	0.000434126	227	0.719925	0.967073	0.187813	0.536772	0.501683	0.000847531	0.889109	0.00140072	0.000570939
3	2	1	23	14.2	13	12	66	13	17.5	14	14	79.25	234	0.754884	0.96902	0.14182	0.597565	0.630752	0.000820885	0.885457	0.00155069	0.000455983	209	0.739238	0.970784	0.160005	0.54615	0.559954	0.000820579	0.839016	0.00143736	0.00051219
4	2	2	29	34.2	14	13	63	15	16	13	11	70.18	261	0.746226	0.97344	0.116517	0.591537	0.667611	0.000832272	0.783378	0.00162211	0.000437351	235	0.72234	0.971459	0.160535	0.512158	0.505387	0.000877286	0.81057	0.00145283	0.000589513
5	2	1	38	22.4	12	10	57	12	14	10	4	79.37	262	0.739083	0.974668	0.181755	0.605405	0.584902	0.000787559	0.936237	0.0014153	0.000473686	194	0.73677	0.968627	0.192688	0.554081	0.545658	0.000783436	0.815819	0.0013498	0.000500251
6	1	3	31	23.2	13	12	64	14	33	13	13	73.77	220	0.73042	0.971409	0.167404	0.641811	0.573624	0.000940118	1.02255	0.00166727	0.000576543	189	0.738295	0.966497	0.180389	0.623898	0.533274	0.000902048	1.00436	0.0015382	0.000583969
7	1	3	30	27.6	12	12	55	13	25	14	12	81.97	247	0.715658	0.971927	0.136384	0.619698	0.61855	0.000944002	0.949172	0.0017411	0.00054545	186	0.722607	0.971034	0.200254	0.581679	0.486905	0.000882207	0.969833	0.00143615	0.000605235
8	1	2	37	37	12	13	45	12	29	14	9	80.56	259	0.697431	0.97429	0.126589	0.623116	0.657083	0.000898727	0.908967	0.00171458	0.000490803	196	0.721552	0.970057	0.211925	0.608856	0.510282	0.000839456	0.974529	0.0014059	0.000556235
9	2	3	32	27	15	14	71	15	27	13	11	92.65	242	0.736469	0.965898	0.119673	0.588481	0.641614	0.000916084	0.859517	0.00173689	0.000505681	188	0.708277	0.972939	0.184944	0.550322	0.470796	0.000936795	0.891683	0.0014921	0.000659144
10	1	2	23	31.2	10	9	50	7	17.5	14	4	78.95	255	0.701763	0.973531	0.127527	0.556043	0.575687	0.000920296	0.804868	0.00163583	0.000562526	202	0.714277	0.968401	0.208488	0.558623	0.45545	0.000907647	0.868971	0.00143199	0.000645474
11	2	3	31	22.2	13	13	63	14	27	14	13	97.26	247	0.72343	0.976798	0.124357	0.623768	0.658592	0.000886689	0.933142	0.0017031	0.000478485	211	0.714499	0.972729	0.166526	0.525744	0.532864	0.000880231	0.88845	0.00149414	0.000573278
12	1	2	33	32.4	13	14	69	15	26	14	12	82.86	277	0.718327	0.972623	0.139717	0.624432	0.62595	0.000928833	0.979861	0.00173776	0.000524371	226	0.717275	0.971886	0.184442	0.59213	0.515808	0.000868102	0.969867	0.00145369	0.000575306
13	1	3	36	23.6	15	16	58	13	33.5	14	15	95.65	228	0.73141	0.970626	0.167989	0.625581	0.555301	0.000905379	0.993715	0.00158288	0.000566629	206	0.746592	0.968953	0.174674	0.590202	0.550642	0.000880232	0.976579	0.00152846	0.000556118
14	1	1	32	31.4	12	13	67	15	30	14	11	87.5	286	0.686076	0.97375	0.112592	0.596177	0.631336	0.00095552	0.86973	0.00178226	0.000542148	213	0.736195	0.969209	0.175825	0.579793	0.512718	0.000887404	0.924175	0.00148128	0.000590465
15	1	2	27	30.8	16	16	56	14	29	14	13	89.71	240	0.728942	0.975405	0.128024	0.609038	0.653485	0.000902297	0.919325	0.00172071	0.000493089	161	0.721796	0.975293	0.237432	0.525781	0.431945	0.000870173	0.900367	0.00134383	0.000633343
16	2	3	21	19.2	14	12	48	11	18.5	6	6	70	207	0.733928	0.966749	0.16762	0.639536	0.624227	0.000822318	1.03391	0.00153005	0.000468453	133	0.713493	0.977248	0.236769	0.578988	0.438056	0.000917419	0.97077	0.00142638	0.000662937
17	2	3	27	24	12	13	52	11	13.5	14	12	73.47	225	0.724906	0.969995	0.161884	0.555581	0.557889	0.000923798	0.907742	0.00161638	0.000577506	195	0.714251	0.968361	0.175623	0.486393	0.49012	0.000938536	0.86963	0.00152742	0.000644093
18	1	1	20	20	12	11	56	14	30.5	10	7	84.62	230	0.73708	0.971182	0.110574	0.542316	0.607704	0.000909612	0.766692	0.00166057	0.000534134	155	0.728454	0.967924	0.193132	0.564523	0.490047	0.000890585	0.921866	0.00145278	0.000609487
19	1	3	21	15.4	11	8	54	11	27	14	10	63.49	236	0.715462	0.972433	0.143254	0.54222	0.556934	0.000984403	0.881393	0.00171696	0.000618123	163	0.734298	0.969252	0.202001	0.542485	0.475695	0.000902876	0.9298	0.00144916	0.000629733
20	1	2	30	17.8	13	14	49	12	18	12	8	77.19	274	0.735701	0.974918	0.184975	0.693396	0.603929	0.000879674	1.10479	0.00161178	0.000513622	172	0.731041	0.975475	0.196968	0.588763	0.513698	0.000909846	0.987975	0.00151529	0.000607122
21	2	2	38	16.4	16	16	71	15	25	14	12	68.49	258	0.734457	0.973577	0.147901	0.572321	0.572589	0.000926919	0.903737	0.0016403	0.000570227	162	0.727948	0.970171	0.211025	0.529358	0.432906	0.000934313	0.9076	0.00143991	0.000681515
22	1	1	22	22.6	16	17	61	15	25	14	12	65.57	193	0.746664	0.960145	0.171957	0.683649	0.55258	0.000928222	1.06077	0.00161199	0.000586339	145	0.74097	0.970226	0.222737	0.635424	0.469756	0.000877701	1.02514	0.00140053	0.000616287
23	2	2	35	23.6	13	12	55	13	11.5	13	11	86.44	262	0.72458	0.975826	0.1298	0.594199	0.597173	0.000922111	0.869717	0.00166708	0.000549628	147	0.726175	0.972342	0.188294	0.575019	0.481791	0.000919759	0.956653	0.00148234	0.000638467
24	1	2	24	28.4	15	16	68	15	32	13	12	82.09	249	0.721963	0.972059	0.161217	0.61394	0.583032	0.000904332	0.971871	0.00162058	0.000546206	180	0.721119	0.97286	0.189772	0.577184	0.495585	0.000901395	0.955582	0.00147832	0.000612934
25	2	2	40	23.2	13	14	46	9	17.5	15	8	77.94	256	0.74211	0.973696	0.135367	0.618457	0.642979	0.000868783	0.959276	0.00165674	0.000474803	212	0.723159	0.970731	0.160679	0.562333	0.552326	0.000903746	0.919653	0.00156575	0.000572745
26	1	2	30	21.2	13	14	70	15	28	14	15	82.76	238	0.697638	0.971336	0.167918	0.646308	0.61128	0.000914775	1.04017	0.00168276	0.00053078	216	0.682941	0.964869	0.178797	0.553403	0.537362	0.000854066	0.894946	0.00146139	0.000550405
27	2	2	22	28.2	17	18	54	12	15.5	13	13	89.83	213	0.697197	0.967325	0.168615	0.569149	0.587755	0.000804889	0.582639	0.0014426	0.000486033	165	0.72883	0.970267	0.151511	0.516483	0.544227	0.000855509	0.771233	0.00146719	0.000549671
28	2	2	32	37	14	15	63	15	31.5	14	13	92.86	258	0.714919	0.975102	0.135009	0.584337	0.599596	0.000896052	0.814088	0.00162794	0.000530109	185	0.718499	0.973788	0.190822	0.517519	0.457916	0.000899981	0.871239	0.00142313	0.000638408
29	2	3	31	24.4	12	13	49	9	22.5	14	16	87.1	293	0.637854	0.976512	0.116788	0.531381	0.596629	0.000924432	0.745278	0.00166199	0.000555652	233	0.667281	0.975322	0.151773	0.483071	0.506949	0.000862178	0.715272	0.0014316	0.00057747
30	2	3	31	20.6	13	14	53	15	22	12	10	78.72	251	0.715086	0.972267	0.148208	0.550963	0.568316	0.000887946	0.819739	0.00155917	0.000552333	169	0.715767	0.976455	0.204496	0.53435	0.492197	0.000884466	0.901262	0.00143972	0.000606839
31	2	1	36	28.6	15	13	53	10	16.5	12	8	88.71	314	0.691967	0.974152	0.112848	0.564244	0.63989	0.00093308	0.843589	0.00175539	0.000521925	216	0.724647	0.970726	0.154513	0.561538	0.568486	0.000866299	0.908343	0.00152319	0.000537852
32	1	1	31	23.6	15	16	57	15	23.5	14	13	84.31	261	0.702703	0.971741	0.128716	0.540844	0.585581	0.000850055	0.659808	0.00151944	0.000515363	182	0.712097	0.967508	0.193286	0.575106	0.486967	0.000838212	0.829056	0.00136526	0.000574687
33	2	1	22	34.6	14	13	61	14	27.5	13	10	77.55	271	0.722802	0.975478	0.112288	0.549512	0.632517	0.000878121	0.773123	0.00164722	0.000493573	223	0.707226	0.969409	0.158369	0.501542	0.515738	0.000876227	0.797231	0.00146455	0.000582067
34	1	1	23	14.4	11	11	65	12	25	13	8	61.02	250	0.720303	0.970422	0.138274	0.552126	0.603581	0.000884134	0.875074	0.001609	0.000521702	182	0.710809	0.969291	0.194107	0.490263	0.461402	0.000878406	0.79087	0.00140646	0.000614381
35	2	2	30	36	13	14	64	13	23.5	14	16	88.71	261	0.71634	0.972145	0.132033	0.538754	0.58901	0.000910511	0.806294	0.00164578	0.000542876	237	0.702773	0.975037	0.170584	0.491256	0.485893	0.000927139	0.84174	0.00150651	0.000637456
36	2	2	38	34.2	10	9	64	12	14	13	11	57.14	270	0.718118	0.975891	0.149627	0.584461	0.605037	0.000868189	0.89041	0.00158201	0.00051128	216	0.722246	0.972392	0.188186	0.558945	0.503068	0.000862909	0.87692	0.00141985	0.000584439
37	2	3	33	28.2	14	14	57	13	14.5	14	15	72.73	261	0.702228	0.969814	0.123723	0.608544	0.646782	0.000915263	0.904898	0.00173338	0.000506204	214	0.697925	0.973709	0.186451	0.579259	0.499544	0.000890385	0.936499	0.00146558	0.000602786
38	1	2	32	14.6	14	11	68	15	27	14	11	89.04	264	0.710721	0.974023	0.133008	0.588319	0.603756	0.000924046	0.920419	0.00166796	0.000552092	203	0.698405	0.972899	0.201141	0.556379	0.472981	0.000911982	0.930946	0.00146507	0.000635439
39	1	3	24	19.2	10	10	41	8	20.5	14	15	94.74	225	0.736071	0.970689	0.174853	0.698705	0.588846	0.000924356	1.08449	0.00165002	0.000561525	168	0.730954	0.972725	0.217054	0.609163	0.481611	0.000887407	1.01533	0.00144242	0.000609898
40	2	3	28	30.4	12	12	53	10	18	14	12	85.71	234	0.74008	0.971471	0.174467	0.623638	0.594356	0.000863219	0.995731	0.001569	0.000510326	211	0.729704	0.969379	0.191584	0.5826	0.518858	0.000852126	0.979453	0.00143195	0.000562215
41	2	2	33	21.6	14	15	63	14	16.5	14	16	79.25	238	0.729074	0.974261	0.118909	0.591167	0.638185	0.000883872	0.831976	0.00165855	0.000496531	173	0.718163	0.977412	0.184862	0.509965	0.464337	0.000896313	0.851737	0.0014279	0.000630522
42	2	1	31	22.8	12	10	43	12	22	14	10	77.97	260	0.725144	0.975926	0.145685	0.59827	0.620319	0.000856341	0.80912	0.00158492	0.000492053	245	0.713737	0.974733	0.166523	0.520615	0.534283	0.000856201	0.824049	0.00145592	0.00055634
43	2	1	28	32.8	15	13	67	14	16.5	12	6	62.12	231	0.704798	0.969372	0.132039	0.530594	0.593352	0.000891566	0.767651	0.00159854	0.000538077	206	0.720645	0.967848	0.13483	0.524747	0.591421	0.000853501	0.800921	0.00153128	0.00051461
44	2	2	25	32.4	13	14	58	14	24	14	5	76.19	239	0.706587	0.970432	0.13468	0.519779	0.584155	0.000934613	0.806964	0.00166312	0.000570361	167	0.721783	0.972829	0.159497	0.486522	0.516569	0.000889816	0.802155	0.00148395	0.000592747
45	2	2	31	28.4	14	13	64	14	24	10	6	82.09	265	0.72199	0.974747	0.127141	0.555372	0.625925	0.000897514	0.85927	0.00166576	0.000513392	188	0.726514	0.969744	0.196077	0.509815	0.463894	0.000899559	0.881963	0.00143022	0.000634228
46	2	1	33	25.4	13	16	65	15	12	14	12	85.07	269	0.719687	0.975516	0.124885	0.578295	0.633445	0.00085473	0.831625	0.00160125	0.000481469	186	0.709429	0.969557	0.191293	0.540376	0.468904	0.000853671	0.862017	0.00136724	0.000596888
47	1	3	36	44	14	14	64	15	30	14	16	82.09	271	0.717339	0.974951	0.118447	0.573867	0.61382	0.000954984	0.866132	0.00174708	0.000558937	204	0.732137	0.969945	0.187824	0.561437	0.489042	0.000907085	0.919546	0.00148776	0.000616749
48	2	2	26	24.8	16	17	65	15	17	14	8	86.36	248	0.719689	0.972642	0.139241	0.540495	0.604195	0.000866145	0.806841	0.0015833	0.000507566	171	0.73644	0.970575	0.17435	0.528318	0.535145	0.00087642	0.876505	0.00149703	0.000566112
49	2	3	26	16.6	11	9	65	15	32	10	7	87.5	255	0.73606	0.975272	0.145588	0.583084	0.583692	0.000895103	0.905562	0.00160676	0.000539275	160	0.700787	0.974872	0.215397	0.558387	0.434477	0.000924021	0.91647	0.00142392	0.000674071
50	1	2	33	16.4	14	14	56	15	17	7	7	92.86	195	0.7431	0.969279	0.181708	0.683683	0.609622	0.000889717	1.10156	0.00163428	0.000517438	198	0.748312	0.970131	0.167962	0.596434	0.570603	0.000872214	0.981662	0.00154264	0.000537
51	1	2	21	29.2	15	13	64	14	19	14	15	69.39	213	0.703572	0.971738	0.165602	0.603688	0.520675	0.00100473	0.934842	0.00167103	0.000671574	130	0.71916	0.974164	0.22064	0.488546	0.485295	0.000751971	-0.0381326	0.00121215	0.000521879
52	2	1	22	18.8	15	14	60	13	24	13	6	81.25	228	0.731113	0.971537	0.125063	0.576586	0.618806	0.000878628	0.841116	0.00162723	0.000504328	204	0.713595	0.97449	0.159629	0.536284	0.537332	0.000860216	0.807738	0.00146045	0.000560097
53	2	1	21	21	16	17	67	14	28.5	14	10	91.94	235	0.735849	0.97325	0.13548	0.54717	0.588485	0.000862223	0.769205	0.00155313	0.000516768	153	0.731598	0.970783	0.163069	0.498713	0.51507	0.000867915	0.770886	0.00145243	0.000575657
54	1	1	28	16.8	14	16	65	13	28	13	13	91.18	263	0.68374	0.97533	0.152829	0.553524	0.549747	0.000924517	0.860997	0.00159588	0.000588835	232	0.709813	0.96803	0.168183	0.57234	0.52897	0.000890602	0.909144	0.00151749	0.000577157
55	1	3	27	26	11	8	52	13	20.5	13	12	88.57	255	0.713444	0.967295	0.158383	0.595537	0.616023	0.000894124	0.977951	0.00165469	0.000513844	175	0.733743	0.965103	0.222026	0.563914	0.461559	0.00088153	0.963235	0.00140375	0.000620421
56	2	3	32	27.6	13	14	60	14	23.5	13	15	82.35	237	0.743178	0.975997	0.18738	0.63276	0.552888	0.00089378	1.03315	0.00155215	0.000564597	207	0.734317	0.969253	0.184204	0.57167	0.519185	0.000922169	0.957445	0.00154339	0.000611558
57	1	2	38	19.6	13	13	43	6	16	13	10	78.87	260	0.729903	0.974378	0.154827	0.557893	0.547762	0.000911349	0.925436	0.00157197	0.000581039	169	0.723449	0.971655	0.237114	0.552431	0.399868	0.000925026	0.926739	0.0013886	0.000693241
58	1	1	20	12.4	12	11	44	12	29.5	13	16	75.93	253	0.732794	0.971753	0.129296	0.627341	0.678514	0.00084362	0.912256	0.0016633	0.00043378	156	0.712115	0.975619	0.228776	0.546129	0.435031	0.0008676	0.935136	0.00134846	0.00062717
59	1	1	27	16.4	14	14	65	15	27.5	13	10	75	225	0.722894	0.974689	0.155051	0.656112	0.635419	0.000888065	1.0438	0.00166578	0.000499207	199	0.701325	0.971426	0.179504	0.580097	0.566233	0.000840949	0.941142	0.00147403	0.00052441
60	2	2	23	24.2	14	13	61	11	21.5	10	8	88.52	242	0.709053	0.970401	0.105981	0.54241	0.627787	0.000902005	0.755613	0.0016795	0.00051326	164	0.685068	0.973532	0.200927	0.526495	0.48753	0.000860659	0.87045	0.00140807	0.000586954
61	1	1	31	26.4	14	13	59	9	11.5	7	7	84.62	225	0.702937	0.968706	0.171179	0.554209	0.562291	0.000902384	0.927269	0.00158077	0.000563194	213	0.675089	0.974427	0.232361	0.528573	0.426297	0.000910099	0.918111	0.00140316	0.000663568
62	2	3	24	19.6	13	12	69	15	24.5	14	12	72	261	0.726889	0.974209	0.125245	0.620905	0.659071	0.000880659	0.92239	0.00170284	0.000469571	163	0.73928	0.974875	0.186096	0.599549	0.53561	0.000868686	0.981024	0.00148219	0.000561937
63	2	3	22	22	9	9	57	14	17.5	14	15	76	259	0.700252	0.974563	0.145859	0.575385	0.585635	0.000908126	0.858488	0.00162898	0.000547701	182	0.695846	0.97242	0.169045	0.512539	0.500207	0.000932216	0.885555	0.00153642	0.000630112
64	1	3	28	38.2	16	17	62	14	28	14	15	72.88	275	0.708776	0.970962	0.15977	0.647834	0.608842	0.000913001	1.0386	0.00166937	0.000534816	232	0.731979	0.969911	0.188509	0.648187	0.538454	0.000859256	1.02616	0.0014737	0.000552034
65	1	3	21	26.4	14	13	63	15	29.5	14	14	69.39	244	0.724039	0.970421	0.142887	0.725152	0.661419	0.000904314	1.108	0.00174638	0.00048328	208	0.731989	0.968616	0.202232	0.682929	0.561085	0.000834476	1.10428	0.0014757	0.000513863
66	2	1	31	21	15	14	61	14	23.5	14	15	89.23	213	0.736354	0.976127	0.14675	0.604529	0.634727	0.000852209	0.849521	0.00160263	0.000476998	154	0.7234	0.976004	0.198868	0.560549	0.4985	0.000863151	0.913511	0.0014168	0.000586326
67	1	2	35	18.4	11	11	62	14	23	14	16	91.43	300	0.690179	0.976348	0.139921	0.587185	0.58469	0.000913369	0.862037	0.00162564	0.000557232	237	0.703985	0.96746	0.216781	0.558953	0.49075	0.000824534	0.892157	0.00134582	0.000563891
68	1	2	27	29.4	13	13	62	15	35	14	12	81.54	229	0.743469	0.967853	0.174175	0.61596	0.577811	0.000867571	0.980498	0.00155113	0.000525791	187	0.721808	0.974181	0.193466	0.554807	0.517872	0.000850661	0.936821	0.00143179	0.000560097
69	2	3	37	25.8	12	14	51	11	25	14	16	80.95	219	0.73116	0.972884	0.145256	0.5461	0.573904	0.00086795	0.794807	0.00153414	0.000534857	250	0.706619	0.968954	0.190235	0.511521	0.473329	0.000874849	0.829314	0.00140268	0.000610936
70	1	2	22	18.8	14	14	66	14	24.5	14	7	68	268	0.710097	0.972091	0.106823	0.567549	0.664596	0.000937464	0.867874	0.00181803	0.000497179	192	0.715016	0.968934	0.194952	0.516384	0.481398	0.00094283	0.888434	0.0015345	0.000646995
71	2	2	28	20.8	16	18	67	15	26	13	14	80	222	0.712335	0.969906	0.129391	0.544983	0.576018	0.000886928	0.723351	0.00157323	0.000543777	172	0.706177	0.974051	0.146834	0.483094	0.519606	0.000868725	0.729468	0.0014632	0.00057149
72	2	1	32	24.4	11	10	47	12	30	12	7	79.17	287	0.715625	0.973964	0.150227	0.558511	0.579867	0.00088837	0.829003	0.00159063	0.000537242	222	0.735013	0.974172	0.164296	0.544299	0.543704	0.000840796	0.870047	0.00144879	0.000536797
73	2	3	28	29.2	15	16	59	15	15	14	14	84.51	255	0.682686	0.974059	0.155895	0.600666	0.581796	0.000918344	0.945418	0.00161911	0.000567962	201	0.714855	0.974895	0.18851	0.579547	0.542487	0.000848321	0.953152	0.00144882	0.000548071
74	2	3	29	28.2	11	10	61	13	23	12	14	79.41	244	0.703934	0.976603	0.128024	0.564922	0.6176	0.000898459	0.843599	0.00165519	0.000520095	161	0.707634	0.973696	0.202698	0.501967	0.473662	0.000890487	0.869058	0.00143193	0.000619767
75	1	2	32	25	14	13	66	15	19	14	12	94.52	229	0.740502	0.972663	0.181807	0.633714	0.568633	0.000870824	1.02238	0.00153612	0.000538175	150	0.731365	0.972496	0.183181	0.552389	0.522308	0.000898006	0.928139	0.00151856	0.000587729
76	2	3	23	26.4	15	16	62	14	29	13	13	76	273	0.722792	0.971448	0.123818	0.568302	0.643729	0.000870623	0.853977	0.00165026	0.000480803	233	0.701532	0.972709	0.184312	0.510135	0.472205	0.00092134	0.86806	0.00148092	0.000641552
77	2	3	33	19.2	16	15	60	15	26	14	11	71.19	270	0.718007	0.975825	0.13613	0.63666	0.628917	0.000889641	0.963163	0.0016646	0.000502163	252	0.725358	0.969015	0.155462	0.59868	0.577398	0.00086536	0.936343	0.00153574	0.000530172
78	2	1	37	21	12	11	55	9	14.5	12	9	71.19	258	0.719147	0.973351	0.150413	0.633907	0.592445	0.00092226	0.989476	0.0016534	0.00055669	243	0.7422	0.970775	0.169625	0.598624	0.560637	0.000855044	0.96095	0.00150339	0.000530869
79	2	3	38	30	12	12	66	14	17	14	4	86.15	233	0.724256	0.968529	0.164	0.590172	0.578333	0.000878193	0.906028	0.00155701	0.000538783	157	0.748359	0.973789	0.184345	0.605126	0.547408	0.000842398	0.950748	0.00145694	0.000535128
80	2	1	35	22.8	8	7	56	12	28	13	11	73.02	263	0.71775	0.967553	0.114835	0.594053	0.653541	0.000888971	0.790554	0.00169861	0.000484152	247	0.673215	0.973933	0.188432	0.540732	0.502545	0.000862932	0.873447	0.00142973	0.000579534
81	2	1	29	17.2	13	12	64	12	21	13	13	69.23	246	0.707348	0.974438	0.124019	0.563764	0.618425	0.000888931	0.826068	0.00164867	0.00050906	169	0.712227	0.972507	0.220072	0.544422	0.453242	0.000853631	0.901502	0.00134383	0.000608531
82	2	1	39	19.2	13	14	73	15	28	13	14	80.28	269	0.739599	0.970792	0.11878	0.554976	0.628628	0.000875846	0.776064	0.00164068	0.000493431	216	0.737531	0.974786	0.182073	0.571009	0.520243	0.000835188	0.880435	0.00140305	0.000551256
83	2	2	33	23	12	11	56	13	20	14	15	83.33	228	0.729229	0.97432	0.146704	0.635108	0.610678	0.000936991	0.993061	0.00171702	0.000546978	201	0.71602	0.963359	0.171042	0.534941	0.520601	0.000937096	0.886963	0.00157882	0.000616235
84	1	3	29	24	15	14	66	14	15.5	13	14	92.96	289	0.661823	0.977934	0.170661	0.584863	0.539969	0.000984316	0.96435	0.00167438	0.000639282	220	0.71195	0.96797	0.187407	0.573156	0.497129	0.000942161	0.954511	0.0015439	0.000641294
85	1	3	37	15	11	11	67	15	28	14	9	83.61	256	0.732136	0.970836	0.15908	0.663708	0.634854	0.000900918	1.07597	0.00168152	0.000510619	152	0.735298	0.970279	0.232205	0.581179	0.481551	0.000859875	1.00359	0.00139723	0.000591197
86	1	2	23	15.2	16	17	58	14	24	9	4	89.74	257	0.712214	0.977488	0.125251	0.607174	0.624067	0.000937641	0.92288	0.00174255	0.000535185	188	0.730409	0.974855	0.196274	0.54418	0.494208	0.000866234	0.911984	0.00142608	0.00058631
87	2	1	20	14.4	14	14	48	10	8.5	14	10	75.56	254	0.719399	0.974735	0.132591	0.584887	0.61863	0.000914205	0.869508	0.00168569	0.000528463	174	0.714463	0.974749	0.192636	0.548455	0.491807	0.000862669	0.89411	0.00141943	0.000584287
88	2	2	33	29.8	15	17	62	14	28	14	11	86.49	238	0.726712	0.976745	0.164865	0.589696	0.588721	0.000890394	0.925686	0.00159445	0.000538366	176	0.750202	0.97005	0.192729	0.558748	0.529146	0.00086351	0.92267	0.00146088	0.000564826
89	2	2	21	28.2	13	11	58	11	27	13	4	66.04	224	0.715358	0.972006	0.150768	0.555418	0.570991	0.000917369	0.876915	0.00161918	0.000566464	158	0.715318	0.973114	0.197609	0.518422	0.483404	0.000886015	0.881987	0.00143454	0.000611752
90	2	1	34	17.8	11	9	64	15	18.5	14	13	83.82	237	0.730755	0.969751	0.145529	0.605259	0.617505	0.000847348	0.909475	0.00156628	0.00048788	195	0.718876	0.974111	0.192018	0.587226	0.510148	0.000841685	0.967752	0.00139557	0.000564741
91	2	3	32	17.4	14	12	67	15	24	14	12	79.31	260	0.742485	0.974877	0.143301	0.612912	0.630752	0.000879858	0.920669	0.00164567	0.000496952	181	0.737907	0.971931	0.241338	0.609259	0.461743	0.000879847	1.01608	0.00139864	0.000620451
92	2	1	28	29.4	18	18	70	15	27	14	12	95.45	232	0.729121	0.970855	0.137741	0.563773	0.60835	0.000869398	0.795601	0.00159579	0.000506203	177	0.733106	0.967211	0.171469	0.527715	0.513303	0.000855556	0.825271	0.0014312	0.000567735
93	2	3	22	16.2	14	12	57	13	15.5	9	11	84.21	251	0.735225	0.971038	0.127682	0.649324	0.687272	0.000896091	0.987442	0.00177363	0.000457319	140	0.731976	0.977924	0.182584	0.542036	0.505458	0.000909663	0.933191	0.00150841	0.000610292
94	2	2	20	20.2	11	10	47	8	19	12	11	85.71	247	0.719224	0.971384	0.151682	0.5457	0.563782	0.000929087	0.864414	0.00162367	0.000581796	148	0.673513	0.976288	0.191759	0.487637	0.440821	0.00093416	0.841607	0.0014548	0.000673841
95	1	3	35	26.6	13	13	60	12	27	13	15	94.52	233	0.716913	0.973069	0.161046	0.636278	0.598466	0.000884906	1.01371	0.00160683	0.000523944	146	0.732117	0.977736	0.231342	0.647303	0.489632	0.000853656	1.07781	0.0013886	0.000586185
96	1	3	24	16	16	16	57	15	22.5	9	7	82	229	0.727175	0.969766	0.128389	0.659696	0.67133	0.000913222	1.01608	0.00177839	0.000480637	202	0.695381	0.969038	0.204565	0.540777	0.47203	0.000901801	0.927649	0.00144934	0.000628029
97	2	2	21	27.8	12	10	57	12	24	14	11	73.81	197	0.748474	0.964812	0.169084	0.659539	0.581427	0.000849759	0.950258	0.00151088	0.0005192	147	0.717514	0.975419	0.190033	0.538811	0.490932	0.000864394	0.90813	0.00141229	0.000590446
98	1	1	28	10.2	8	9	33	6	19.5	14	10	73.91	238	0.731437	0.97503	0.138944	0.58425	0.604838	0.000874882	0.848973	0.00158773	0.00051846	172	0.738569	0.971861	0.230725	0.613595	0.45215	0.000885674	0.99204	0.00138912	0.000633951
99	2	1	27	24	13	15	56	11	15.5	13	12	82.46	259	0.695643	0.973254	0.112229	0.539009	0.610195	0.000873691	0.702949	0.00160285	0.000509111	248	0.712727	0.970527	0.156708	0.512742	0.536214	0.000841626	0.709519	0.00143923	0.000542826
100	1	2	26	18	13	12	58	13	16	14	9	91.11	228	0.738668	0.972756	0.150016	0.614894	0.631179	0.000855672	0.969443	0.00160945	0.000478784	184	0.720277	0.968718	0.194319	0.544863	0.508116	0.000858978	0.916666	0.00143228	0.000572328
101	1	1	33	25.6	15	7	67	15	22	14	12	72.22	250	0.743004	0.972463	0.159393	0.673328	0.578986	0.000974238	1.02411	0.00172942	0.000596645	174	0.740957	0.970646	0.227593	0.612459	0.444528	0.000898713	1.01091	0.00140838	0.000643881
102	1	1	21	15.8	13	13	62	13	14	14	11	77.42	225	0.739885	0.973149	0.153025	0.582076	0.566394	0.000876496	0.797741	0.001542	0.000543747	219	0.699948	0.973185	0.192842	0.493036	0.464078	0.00088161	0.795897	0.00140132	0.000621754
103	1	2	28	26.8	13	14	58	13	31	14	16	92.75	264	0.724913	0.974631	0.160443	0.604696	0.575065	0.000916752	0.937718	0.0016209	0.000564676	207	0.731914	0.97364	0.190725	0.555742	0.504709	0.000874788	0.92992	0.00145219	0.000586088
104	2	1	31	38.4	14	15	61	15	19.5	13	15	75.71	275	0.710197	0.974353	0.128101	0.52413	0.563526	0.000880872	0.720815	0.00154075	0.000550935	174	0.718924	0.970822	0.14654	0.488498	0.512657	0.00090277	0.769643	0.00150168	0.000603316
105	1	2	36	13.4	16	17	57	15	26	14	13	95.71	222	0.699362	0.968044	0.185884	0.678261	0.564586	0.000931344	1.08717	0.00162975	0.00058214	128	0.725852	0.969162	0.206202	0.558724	0.482781	0.000905471	0.961399	0.00146289	0.00062676
106	1	1	32	22	12	12	58	14	29	10	10	79.31	208	0.756202	0.968733	0.169327	0.605857	0.597154	0.000877864	0.99254	0.00158211	0.00052574	157	0.728898	0.967748	0.20284	0.564533	0.46752	0.000919158	0.949449	0.00146999	0.000643744
107	2	1	30	16.6	10	8	67	13	13	14	10	87.5	267	0.704559	0.973044	0.120043	0.566986	0.642199	0.00089238	0.86734	0.00168566	0.000495739	281	0.710815	0.970129	0.18436	0.535579	0.52383	0.000842323	0.869179	0.00143591	0.00054553
108	1	3	28	31.6	16	16	71	15	29	14	13	85.71	261	0.719633	0.974633	0.140471	0.614257	0.647294	0.000882352	0.98615	0.0016806	0.00048323	234	0.717636	0.974237	0.188512	0.55878	0.523049	0.000856019	0.927435	0.00143954	0.000564259
109	1	1	24	26.6	15	16	63	15	33	12	15	66.13	269	0.697516	0.977651	0.102355	0.54778	0.657838	0.000849179	0.720217	0.00164337	0.000452086	215	0.733837	0.972611	0.154023	0.544949	0.581081	0.000830107	0.861913	0.00148825	0.000501035
110	2	3	26	22.6	14	13	63	15	22.5	7	10	92.98	259	0.718084	0.972639	0.141167	0.574197	0.611753	0.000908309	0.917872	0.0016594	0.000532761	182	0.716509	0.971451	0.214103	0.546175	0.465117	0.000895821	0.921846	0.00142557	0.000630944
111	1	2	34	35.6	12	13	64	14	20	9	15	86.76	268	0.709013	0.974821	0.162132	0.655858	0.607794	0.000916125	1.02758	0.00168252	0.000532927	182	0.726365	0.974207	0.198525	0.598409	0.50994	0.000900766	0.982921	0.00149975	0.000601275
112	1	2	26	21.4	8	6	61	15	26	14	9	75	237	0.723595	0.968145	0.135693	0.538264	0.593128	0.000954733	0.875652	0.00171799	0.000573107	194	0.721158	0.969912	0.183134	0.51054	0.48503	0.000920769	0.863857	0.00149744	0.000632433
113	1	2	33	25.4	10	9	55	14	27	14	5	95.52	264	0.737614	0.973559	0.133458	0.658321	0.684589	0.000902714	1.05291	0.00179997	0.000454087	228	0.730918	0.970176	0.209476	0.601029	0.498688	0.000859307	0.992463	0.00142468	0.000576621
114	2	1	23	39.8	15	15	57	15	32	12	8	82	259	0.719583	0.974581	0.113856	0.589895	0.670028	0.000851431	0.725616	0.00166335	0.000445471	232	0.724901	0.971919	0.152719	0.521804	0.53411	0.000866562	0.795444	0.00147474	0.000562475
115	2	1	31	24	14	13	60	15	26.5	12	14	90.41	245	0.71336	0.971921	0.121292	0.548536	0.627696	0.000875747	0.799235	0.0016361	0.00049557	179	0.720383	0.966036	0.177556	0.528535	0.499553	0.000844278	0.841607	0.00139189	0.000570472
116	1	3	28	20.2	12	11	62	13	16.5	14	15	71.19	186	0.735423	0.960302	0.175873	0.62538	0.577636	0.000869077	0.998543	0.00153901	0.000534112	205	0.731013	0.963112	0.191472	0.593319	0.540758	0.000844024	0.9818	0.00145813	0.000536971
117	1	2	20	25.6	15	16	49	12	31	14	14	79.59	259	0.709175	0.973246	0.149716	0.612422	0.608381	0.000918794	0.970245	0.00167038	0.000543001	191	0.718365	0.967748	0.186411	0.523972	0.505764	0.000880019	0.897862	0.00145818	0.000590939
118	2	1	31	33.6	11	11	68	15	24	13	15	92.54	236	0.726065	0.972068	0.123543	0.589223	0.63864	0.000894511	0.900822	0.00168703	0.000498254	203	0.696257	0.968045	0.170075	0.483579	0.51175	0.00088177	0.79202	0.00146617	0.00058957
119	1	1	34	19.6	10	11	47	10	28.5	13	15	94.12	245	0.719186	0.976075	0.116955	0.619429	0.655998	0.000884184	0.923365	0.00168562	0.000483466	167	0.723577	0.973912	0.207918	0.553296	0.491772	0.000859379	0.905271	0.00140433	0.000586903
120	2	3	20	22.4	13	10	57	12	23	14	7	75	240	0.7163	0.970542	0.137288	0.567256	0.578817	0.000913496	0.87184	0.00162933	0.000555578	180	0.693399	0.970545	0.200308	0.510187	0.442892	0.000928256	0.881755	0.00144114	0.000671817
121	2	3	20	21.6	14	13	58	14	28	14	13	74.47	253	0.745422	0.975384	0.134145	0.611995	0.603785	0.000912581	0.927373	0.00165848	0.000539633	172	0.72829	0.973209	0.207018	0.535814	0.460783	0.000878183	0.876919	0.00139579	0.000619381
122	1	2	26	37.8	16	13	61	12	18.5	13	13	91.3	287	0.724913	0.971197	0.13145	0.636858	0.665847	0.00087326	0.911019	0.00168285	0.000468465	207	0.735927	0.971295	0.200975	0.58793	0.515023	0.000834543	0.973826	0.00140776	0.000547933
123	2	2	36	25	12	11	49	11	21	13	9	87.88	121	0.749188	0.960835	0.158059	0.619868	0.571439	0.000868843	0.916251	0.00154503	0.000530748	129	0.723797	0.980931	0.200944	0.619306	0.527844	0.000853649	1.03955	0.00143757	0.000561691
124	2	3	31	13.8	15	15	63	15	24	13	6	69.57	283	0.705989	0.976343	0.111553	0.580389	0.674252	0.000918446	0.922181	0.00179629	0.000479526	253	0.720824	0.970835	0.168561	0.542494	0.544564	0.000883487	0.931921	0.00151968	0.000565392
125	1	3	29	22	11	10	61	14	28	14	13	76.32	253	0.733487	0.972966	0.159248	0.663078	0.618254	0.000879536	1.04376	0.00162836	0.000505124	211	0.729013	0.969546	0.212784	0.621952	0.498965	0.00086982	1.02342	0.00143612	0.000586668
126	1	3	28	14.8	8	9	47	12	18	14	13	91.67	213	0.729349	0.970362	0.189598	0.638022	0.556076	0.000908667	1.01138	0.0015807	0.00057265	152	0.732304	0.965615	0.155338	0.565949	0.578959	0.00088825	0.941551	0.00158323	0.000540763
127	2	2	31	21.8	13	12	61	12	14	14	11	73.85	265	0.7183	0.977162	0.128418	0.561299	0.59218	0.000901237	0.835595	0.00162987	0.000536922	192	0.69884	0.977129	0.195272	0.486174	0.463521	0.000916555	0.844273	0.00145939	0.000645136
128	1	2	37	16.8	10	7	48	10	16.5	12	5	75	252	0.718885	0.971834	0.144426	0.62237	0.591306	0.000919374	0.969642	0.00165526	0.000551431	205	0.732598	0.966463	0.163948	0.599968	0.547761	0.000876116	0.916698	0.00150232	0.000563017
129	2	2	20	15.8	11	10	48	9	20.5	13	4	78.72	240	0.714746	0.974195	0.128163	0.534836	0.587794	0.000937818	0.820394	0.00167601	0.00056872	227	0.70882	0.975321	0.156198	0.490958	0.501041	0.000926995	0.791102	0.00152992	0.000625534
130	2	3	31	24.2	13	11	66	13	21	13	6	90.77	265	0.697727	0.974093	0.113957	0.577627	0.649466	0.000937436	0.889663	0.00177468	0.000518816	192	0.736965	0.972189	0.197411	0.603478	0.509604	0.000874745	0.967646	0.00145592	0.000584158
131	2	2	20	26.8	14	15	58	14	27	13	9	67.35	256	0.73962	0.97583	0.116134	0.642776	0.684604	0.000878136	0.902706	0.00172522	0.000454596	191	0.721369	0.972776	0.209353	0.591799	0.509926	0.000834997	0.946703	0.00140797	0.000548511
132	1	3	24	10.2	13	12	66	15	25	13	14	81.48	278	0.714132	0.972451	0.106092	0.629812	0.680138	0.000911867	0.908154	0.00180595	0.000464828	163	0.724245	0.972853	0.198298	0.518706	0.468332	0.000895751	0.894352	0.00143091	0.000628169
133	2	1	21	28.6	16	17	65	15	26	13	14	76.67	214	0.713186	0.975543	0.173949	0.531186	0.532832	0.000878975	0.781379	0.00149205	0.000572437	170	0.734503	0.971734	0.186431	0.506566	0.490198	0.000851054	0.798814	0.00138647	0.000583345
134	2	2	23	27.2	14	15	68	15	27	14	11	87.5	256	0.714738	0.975323	0.11674	0.623541	0.64778	0.000926773	0.930103	0.00175704	0.00051164	194	0.721339	0.967637	0.167253	0.566044	0.519386	0.000918926	0.925379	0.00154424	0.000606268
135	2	1	30	37.4	16	14	66	15	25.5	14	14	93.06	216	0.722216	0.969319	0.152206	0.603468	0.589629	0.000885081	0.928323	0.00159418	0.00053053	167	0.725023	0.975351	0.219115	0.617017	0.529309	0.00080283	0.978078	0.00135532	0.000526588
136	1	3	41	22	12	10	57	12	13	10	3	89.71	262	0.718521	0.975104	0.146146	0.677907	0.638649	0.00090986	1.05474	0.00169924	0.000515171	213	0.73026	0.971537	0.203059	0.619719	0.524443	0.000868198	1.04004	0.0014605	0.000572049
137	1	3	34	28.2	14	15	56	13	18	9	13	91.04	248	0.705215	0.970353	0.172992	0.693623	0.589686	0.000905966	1.0145	0.0016201	0.000548899	243	0.729973	0.971588	0.178407	0.669874	0.517926	0.000937138	1.01975	0.0015738	0.000618809
138	2	3	25	15.2	11	10	62	14	26	14	4	81.25	263	0.717232	0.972526	0.157227	0.625589	0.575897	0.000921598	0.948201	0.00161567	0.000574562	160	0.73813	0.975201	0.227985	0.576836	0.448217	0.000878315	0.956136	0.00137524	0.000629851
139	1	1	33	21.2	9	11	50	14	19.5	7	11	84	283	0.694645	0.972522	0.126028	0.585026	0.582398	0.000969033	0.87784	0.00171961	0.000593747	248	0.726187	0.966991	0.16843	0.612161	0.570534	0.000854821	0.95915	0.00151052	0.00052697
140	2	1	35	19.4	13	14	69	15	29	14	15	78.69	270	0.751541	0.973599	0.143338	0.60693	0.624813	0.000866784	0.954345	0.00162028	0.000490036	212	0.709058	0.970776	0.178572	0.521712	0.500743	0.000902044	0.884374	0.00148578	0.000610173
141	2	2	34	17.8	15	15	72	15	25.5	13	13	95.65	280	0.695277	0.975881	0.145303	0.583957	0.564975	0.000911914	0.855956	0.0015908	0.000572472	187	0.724054	0.966074	0.167746	0.561641	0.532535	0.000847056	0.888939	0.00144342	0.000548875
142	2	3	20	15.4	13	12	49	10	28	13	11	80.43	240	0.708851	0.975148	0.135632	0.567957	0.595814	0.000933304	0.855595	0.00168555	0.000557181	153	0.706169	0.975265	0.179961	0.515231	0.490045	0.000888274	0.857272	0.00144868	0.000608069
143	1	1	30	25.2	12	13	57	13	28	14	4	91.3	242	0.716063	0.97389	0.13971	0.633639	0.618586	0.000904449	0.933883	0.00166428	0.000524533	187	0.74102	0.970216	0.198454	0.60243	0.484873	0.000910423	0.977984	0.00147638	0.000627446
144	1	3	31	32	14	15	65	15	26.5	14	16	92.96	243	0.705029	0.971313	0.151655	0.570351	0.569884	0.000937004	0.874211	0.00164641	0.000582302	211	0.725114	0.973908	0.184561	0.570332	0.533644	0.000867668	0.939915	0.0014769	0.000563051
145	2	3	21	17.8	18	19	63	13	25	14	11	73.81	227	0.731858	0.975238	0.177327	0.570868	0.533846	0.000870817	0.893541	0.00147592	0.000568264	160	0.722216	0.975265	0.192938	0.524288	0.479068	0.000882168	0.891418	0.00142722	0.000609643
146	2	2	28	21.2	12	12	68	15	18	14	13	74.42	282	0.692388	0.97698	0.0988311	0.562252	0.641614	0.000886071	0.659518	0.00167909	0.000489559	222	0.712626	0.9726	0.182183	0.500945	0.477695	0.000878541	0.780532	0.00141865	0.000608488
147	2	2	26	43.2	13	14	68	15	26.5	14	8	79.1	259	0.713356	0.973266	0.140568	0.582535	0.577092	0.000953138	0.923504	0.00168833	0.000585541	170	0.741849	0.970586	0.185802	0.568724	0.522095	0.000868747	0.943986	0.00145871	0.000573764
148	1	1	21	11.2	12	12	60	15	20	13	11	77.94	246	0.683666	0.97121	0.148587	0.55189	0.568703	0.000947308	0.873388	0.00165801	0.000591955	237	0.675948	0.967196	0.197556	0.500329	0.508167	0.000860879	0.640054	0.00142468	0.000578978
149	2	3	36	14.4	11	11	42	9	24	13	8	92.5	285	0.728061	0.976974	0.147674	0.645757	0.6092	0.000916111	1.0042	0.00167664	0.000535846	233	0.727604	0.974793	0.178388	0.634202	0.537014	0.000888274	0.988215	0.00151769	0.000573568
150	2	1	21	27.2	13	14	55	11	35	13	8	78.57	245	0.712294	0.973012	0.115728	0.549333	0.663647	0.000872657	0.837025	0.0016979	0.000460035	168	0.716915	0.972608	0.200544	0.501132	0.464088	0.000892418	0.858455	0.00142534	0.000625959
151	1	2	40	18	9	7	61	10	12	13	18	90.14	224	0.738609	0.970485	0.169959	0.675115	0.573957	0.000939449	1.0185	0.00166236	0.000577993	135	0.747444	0.972366	0.21297	0.610535	0.462379	0.000949765	1.00506	0.00150873	0.00067028
152	2	3	35	19.6	13	11	55	10	13.5	12	15	83.02	273	0.728679	0.968341	0.149174	0.673921	0.636163	0.000925132	1.06612	0.00174263	0.000516385	186	0.737512	0.974918	0.212851	0.627408	0.513357	0.000841276	1.03949	0.00140012	0.000561857
153	2	2	24	31.8	13	14	54	14	20	13	11	77.94	263	0.711178	0.973227	0.125747	0.561823	0.600168	0.000918461	0.818522	0.00167152	0.000541931	172	0.716784	0.969074	0.161097	0.496547	0.511574	0.0009239	0.8366	0.0015416	0.00061505
154	1	3	25	15.6	12	10	65	15	24	12	8	79.59	211	0.744488	0.972423	0.178374	0.623236	0.576182	0.00085381	1.00667	0.00152245	0.000519488	167	0.719577	0.970185	0.224375	0.60244	0.488855	0.000868626	0.985456	0.00141859	0.000593647
155	1	2	21	22.2	11	11	57	14	26.5	14	12	75	252	0.707978	0.967078	0.143449	0.552171	0.593089	0.000936355	0.913167	0.00168859	0.000560238	169	0.714781	0.96916	0.204346	0.533309	0.473839	0.000883743	0.901071	0.00143377	0.000608731
156	1	1	28	13	13	12	60	13	26.5	14	16	66.04	256	0.721657	0.974001	0.140427	0.551441	0.574457	0.000904234	0.831675	0.00160268	0.000555009	176	0.740001	0.974013	0.173756	0.581146	0.542978	0.000862265	0.932017	0.0014772	0.000554799
157	1	2	31	22.2	12	10	48	9	19.5	13	8	94.29	247	0.743323	0.966915	0.201023	0.808953	0.538323	0.000967107	1.1473	0.00165024	0.00062554	175	0.728904	0.972214	0.206225	0.645031	0.494861	0.000901493	1.04047	0.00148433	0.000610076
158	2	1	25	23	11	9	72	15	21.5	14	12	72.09	243	0.704866	0.971952	0.114852	0.534009	0.590298	0.000866234	0.626833	0.0015675	0.0005156	183	0.722626	0.971811	0.169047	0.528472	0.506004	0.000874319	0.799437	0.00144711	0.000587926
159	1	3	33	22	6	7	52	9	16.5	3	4	76.06	267	0.719444	0.972917	0.167652	0.661971	0.573151	0.000915561	1.02882	0.00161676	0.000564962	217	0.724948	0.969033	0.183567	0.595211	0.51103	0.000914281	0.981441	0.00152432	0.000609263
160	1	2	33	28	15	15	61	14	25.5	14	7	92.31	250	0.739467	0.976004	0.170666	0.635595	0.581805	0.00089482	1.01072	0.00158974	0.00054736	184	0.709983	0.973817	0.228811	0.63009	0.484904	0.000838011	0.982525	0.00136302	0.000575505
161	2	1	32	25.4	15	16	51	13	16.5	14	16	82.26	221	0.72583	0.965976	0.147039	0.545447	0.559201	0.000901532	0.845249	0.00157032	0.00056714	212	0.718788	0.96846	0.175741	0.52595	0.484057	0.000892484	0.856592	0.00144567	0.000615891
162	1	3	20	25.6	15	15	66	14	28	14	8	87.8	266	0.708034	0.974855	0.133413	0.623284	0.640559	0.000907971	0.960446	0.00170768	0.000508116	216	0.718621	0.970926	0.201961	0.603995	0.516123	0.000864302	0.997804	0.0014509	0.000571002
163	1	3	29	21.4	11	11	41	10	21	14	13	67.16	280	0.721623	0.974556	0.127661	0.638058	0.628485	0.000903035	0.929959	0.00168921	0.000509947	149	0.752974	0.974391	0.217715	0.68644	0.523108	0.000841897	1.10885	0.00141986	0.000552916
164	2	2	37	11.8	8	8	57	7	14	14	9	58.21	266	0.716537	0.974143	0.128898	0.563947	0.612389	0.000872166	0.812153	0.00160725	0.000504624	210	0.712656	0.975345	0.148832	0.499434	0.54297	0.000855311	0.743831	0.00147417	0.000545881
165	1	1	35	41.8	12	12	64	15	14	14	10	81.54	247	0.717552	0.970848	0.149921	0.60499	0.586047	0.000956684	0.967288	0.00171391	0.000578071	238	0.742733	0.974305	0.158524	0.603154	0.58275	0.000876604	0.985579	0.00157907	0.00052537
166	2	1	20	4.6	10	11	59	13	10	4	11	86.84	248	0.732469	0.973043	0.16859	0.601344	0.58069	0.00082422	0.916806	0.00147715	0.000497755	228	0.728971	0.972843	0.139885	0.587933	0.612973	0.000831216	0.873876	0.00153966	0.000476994
167	1	2	24	22.8	14	14	60	15	30	13	10	66.07	253	0.719869	0.971151	0.122665	0.582791	0.621455	0.00092317	0.841661	0.00171279	0.000528359	190	0.734262	0.969586	0.160317	0.535649	0.519149	0.000936661	0.89915	0.00157093	0.000619526
168	1	3	32	37.6	12	13	59	12	18.5	14	16	92.54	252	0.722646	0.972959	0.148506	0.664076	0.640841	0.000893343	1.025	0.0016948	0.000492613	174	0.714529	0.971598	0.207271	0.558374	0.47231	0.000900803	0.946647	0.00144283	0.00062979
169	2	1	29	30	11	10	56	11	13.5	12	15	74.63	244	0.741453	0.978126	0.106989	0.576647	0.654978	0.000856146	0.775381	0.00164017	0.000464134	167	0.734196	0.972775	0.190479	0.544917	0.479077	0.000872226	0.884937	0.00140778	0.000604449
170	1	3	32	16.8	14	15	66	15	28.5	12	12	79.69	234	0.733152	0.974663	0.151806	0.66596	0.579414	0.000952465	1.00852	0.0016949	0.00058125	224	0.746274	0.971451	0.169067	0.67093	0.56399	0.000888978	1.03638	0.00155924	0.000553848
171	2	3	35	30.2	13	13	70	15	23	10	11	74.19	270	0.677658	0.97505	0.13275	0.566458	0.599016	0.000931084	0.900312	0.00168888	0.000552189	251	0.692591	0.973423	0.165998	0.525563	0.520707	0.000903184	0.893158	0.00151137	0.000599091
172	1	3	37	18.8	13	10	48	11	21	12	13	76.47	227	0.713013	0.974462	0.148845	0.66207	0.652546	0.00091417	1.03814	0.00174691	0.000497802	219	0.730712	0.969358	0.208833	0.59549	0.516727	0.000861304	0.998973	0.00144908	0.000567414
173	2	3	25	29.8	15	13	65	15	28.5	12	13	88.68	273	0.727677	0.974539	0.166804	0.69798	0.578314	0.000954955	1.06271	0.00169983	0.000582517	213	0.742424	0.971636	0.179299	0.618911	0.546361	0.000886265	1.00781	0.00152881	0.000564994
174	1	1	25	27.6	12	12	46	9	24	14	11	76.12	215	0.758181	0.970061	0.167258	0.628214	0.600308	0.000841964	0.999444	0.00153975	0.000493069	203	0.743872	0.970562	0.210808	0.587902	0.491582	0.000857615	0.974967	0.00141608	0.000578381
175	1	3	37	25.8	18	15	58	15	26	13	14	96.77	307	0.699694	0.97614	0.146769	0.676567	0.618242	0.000942836	1.03426	0.00173594	0.000546282	198	0.722088	0.970332	0.211357	0.613615	0.482373	0.000898105	1.00484	0.00145531	0.000619501
176	2	3	28	13.8	15	15	70	14	25.5	13	11	93.55	277	0.709107	0.974928	0.138021	0.63204	0.626765	0.000939385	0.96719	0.00174164	0.000538255	192	0.735454	0.976916	0.181849	0.561711	0.512649	0.00087993	0.946905	0.00147532	0.000582234
177	1	1	24	16.2	8	6	45	7	27	14	15	90.14	226	0.732993	0.967018	0.15666	0.601927	0.578784	0.000902444	0.966436	0.00160613	0.0005506	179	0.734631	0.971111	0.191864	0.57954	0.50827	0.000869493	0.958709	0.00144466	0.000581912
178	1	1	31	34	12	11	56	13	22.5	13	15	89.86	215	0.744518	0.973771	0.155029	0.646906	0.616781	0.000848955	1.01701	0.0015699	0.000488481	176	0.724308	0.972535	0.209219	0.545348	0.48129	0.00087778	0.908551	0.0014329	0.000600218
179	1	2	27	23.4	17	17	69	13	21	14	13	81.69	255	0.719918	0.972789	0.141731	0.576937	0.625172	0.000898044	0.913988	0.00166915	0.000512494	211	0.719283	0.971031	0.221962	0.535816	0.455144	0.00086311	0.893895	0.00137164	0.000608845
180	1	2	23	15.2	10	9	55	10	12	7	4	76.6	250	0.70627	0.974021	0.110757	0.555132	0.621792	0.000867956	0.704299	0.001605	0.000499435	178	0.709695	0.973171	0.179283	0.521839	0.50669	0.000859769	0.855677	0.00142352	0.000577892
181	2	2	22	33.4	14	15	52	11	22	14	10	74.42	268	0.718906	0.973353	0.10851	0.572849	0.670642	0.000914944	0.884155	0.00178208	0.000481378	191	0.724321	0.96942	0.151659	0.554773	0.567907	0.000893098	0.916717	0.00157517	0.000552059
182	1	3	35	14.4	8	7	55	13	15.5	10	8	78.79	273	0.682485	0.970261	0.163948	0.646871	0.568481	0.000961454	1.00246	0.00169287	0.000595743	164	0.733024	0.973856	0.192302	0.637533	0.525083	0.000885129	1.03643	0.00149599	0.000579701
183	2	1	23	25.8	13	12	65	15	17	14	6	71.19	234	0.720284	0.971323	0.158366	0.550648	0.528226	0.000903795	0.847521	0.0015314	0.000589992	144	0.733228	0.975822	0.193137	0.543842	0.466912	0.00088117	0.876728	0.00140368	0.000619917
184	2	3	27	24.4	10	10	54	12	14	12	12	65.08	240	0.725797	0.974051	0.138801	0.600425	0.636342	0.000885102	0.950294	0.00167727	0.00048902	216	0.727085	0.972229	0.161698	0.572772	0.558966	0.000875761	0.935949	0.001529	0.000549144
185	2	3	32	35.2	16	16	57	11	12.5	14	10	82.46	251	0.726123	0.97431	0.14936	0.592749	0.597645	0.000882762	0.869475	0.00159693	0.00052568	190	0.739869	0.969384	0.162788	0.539719	0.549575	0.000879264	0.900179	0.00151994	0.000558926
186	2	1	37	18	15	16	67	15	16	14	10	79.66	266	0.736155	0.978205	0.139926	0.625174	0.651878	0.000784881	0.718427	0.00149252	0.000431063	176	0.715826	0.975342	0.20693	0.539344	0.483381	0.000835554	0.86012	0.00135113	0.000577765
187	2	2	33	18.2	14	14	53	14	15	14	10	68.57	263	0.738178	0.974726	0.139029	0.616651	0.626739	0.000850367	0.857279	0.00157657	0.000487268	239	0.728799	0.97242	0.165959	0.565764	0.562631	0.000837326	0.899568	0.00146499	0.000523493
188	1	1	31	22.8	11	11	62	13	24.5	14	13	89.86	258	0.738416	0.977399	0.162781	0.657769	0.61628	0.000866512	1.04666	0.00159317	0.000503181	223	0.748451	0.969202	0.168822	0.63292	0.590377	0.000850594	0.979378	0.00153557	0.000508107
189	1	3	28	25.4	10	10	53	15	29	13	15	86.27	228	0.744322	0.975462	0.167185	0.631248	0.574273	0.000894131	1.01194	0.00158591	0.000548242	179	0.723574	0.973692	0.208506	0.571742	0.477831	0.000880422	0.961646	0.00141807	0.000611598
190	1	1	39	31.4	11	9	41	8	11.5	6	4	86.96	234	0.726692	0.971032	0.138111	0.601732	0.611691	0.000940511	0.952853	0.00171385	0.00055384	200	0.732886	0.975415	0.21068	0.610527	0.507675	0.000882719	1.00013	0.00146663	0.000590762
191	1	3	35	19.8	13	12	56	11	26	12	13	86.11	283	0.717755	0.976368	0.134319	0.595213	0.603067	0.00095491	0.92999	0.00173342	0.000565654	191	0.742861	0.973945	0.203636	0.638066	0.506722	0.000859381	1.01302	0.00142802	0.000575062
192	1	1	31	10.6	11	9	51	13	21.5	14	11	95.24	267	0.703699	0.976051	0.126111	0.579338	0.62329	0.000942554	0.889946	0.00174185	0.000542907	196	0.728589	0.970958	0.167448	0.538951	0.552438	0.000850407	0.895114	0.0014695	0.000540864
193	1	3	24	38.4	12	10	48	9	8.5	8	11	83.87	217	0.749377	0.972156	0.176308	0.647214	0.573964	0.000864954	1.03337	0.00152766	0.000533602	154	0.748693	0.976548	0.204397	0.592556	0.503589	0.00083779	0.992064	0.00138805	0.000562661
194	1	1	38	17	13	13	48	8	25	14	14	78.87	253	0.723239	0.974332	0.137167	0.614468	0.648088	0.000841881	0.912455	0.00160158	0.00046203	190	0.726207	0.971907	0.187378	0.588576	0.538124	0.000832645	0.971942	0.00142812	0.000534906
195	1	1	39	18.4	11	9	66	12	18.5	12	12	77.61	247	0.703402	0.972647	0.150952	0.547974	0.55819	0.00092438	0.882706	0.00160805	0.000582543	211	0.727366	0.968272	0.176114	0.569795	0.511626	0.000882032	0.901594	0.00147379	0.000586152
196	2	3	31	35.8	14	12	57	13	19.5	13	12	79.66	271	0.721559	0.968718	0.134889	0.582257	0.612533	0.000876331	0.819973	0.00160306	0.000512967	182	0.724735	0.973559	0.19868	0.541243	0.491106	0.000842239	0.876331	0.00137981	0.000573454
197	2	1	22	44.6	14	13	60	12	22.5	13	7	74	260	0.723243	0.973316	0.11822	0.617984	0.657118	0.000914478	0.912586	0.0017606	0.000491415	176	0.726444	0.971947	0.188321	0.552608	0.481854	0.000907281	0.919317	0.00147199	0.000624925
198	1	3	30	18.2	11	7	63	10	24	14	14	84.91	262	0.719602	0.972825	0.147603	0.667155	0.612194	0.000925751	1.02754	0.00170196	0.000537648	180	0.748395	0.968894	0.201874	0.709174	0.534159	0.000886597	1.08888	0.00150361	0.000578091
199	1	3	23	18	12	11	69	15	20	14	10	74.07	255	0.699061	0.97341	0.152463	0.55122	0.550753	0.000941438	0.877981	0.00164246	0.000590925	223	0.723379	0.971117	0.186397	0.544584	0.487224	0.000910115	0.893406	0.00148241	0.000623969
200	2	2	35	24.2	14	14	66	15	26.5	13	7	68.97	269	0.713258	0.975742	0.0967914	0.529897	0.639161	0.000902406	0.665221	0.00169573	0.000505742	218	0.710815	0.975141	0.151053	0.517722	0.547747	0.000862201	0.817185	0.00148964	0.000548482
201	1	1	28	30.6	12	12	52	12	13.5	13	10	85.92	248	0.71767	0.969901	0.157704	0.628907	0.606433	0.000895856	1.00536	0.00165257	0.000517501	170	0.729379	0.970908	0.193146	0.56511	0.504857	0.00086936	0.949636	0.00143885	0.000584614
202	1	1	20	21.8	12	10	58	15	22.5	14	16	86.84	231	0.73565	0.974038	0.150421	0.568316	0.599189	0.00087139	0.912995	0.00158784	0.000513166	173	0.741486	0.973766	0.158937	0.57826	0.598336	0.0008241	0.896522	0.0014951	0.000488601
203	1	1	29	17	11	8	50	10	17	12	10	86.15	280	0.688931	0.97372	0.115428	0.553286	0.622298	0.000914082	0.804553	0.0017035	0.000519374	154	0.722861	0.973529	0.209704	0.557706	0.477379	0.000851027	0.930678	0.00137446	0.000589309
204	2	2	35	28	13	12	54	9	23	14	8	79.71	262	0.711828	0.973961	0.129466	0.576474	0.591174	0.000928159	0.79089	0.00165119	0.000566643	203	0.69509	0.970844	0.191958	0.557635	0.501498	0.000896712	0.892686	0.00147648	0.00060683
205	1	3	30	28.6	12	10	56	12	25.5	12	12	86.96	210	0.715114	0.966693	0.174601	0.622084	0.569417	0.000948714	1.01216	0.00166455	0.000590797	163	0.692814	0.969238	0.179682	0.516958	0.512507	0.000919992	0.909194	0.00153312	0.000613429
206	2	2	21	32.2	15	15	60	14	21.5	14	11	69.7	262	0.742061	0.97649	0.144461	0.578389	0.632057	0.000850867	0.900241	0.00160004	0.000476282	202	0.730923	0.971301	0.180804	0.535084	0.511668	0.000872568	0.881813	0.00145268	0.000582513
207	1	1	27	18.4	14	14	64	13	21.5	7	9	82.54	259	0.717639	0.971491	0.132455	0.571544	0.630558	0.000891368	0.897567	0.00167108	0.000501511	163	0.741477	0.972766	0.161855	0.61754	0.558824	0.000860649	0.970022	0.00150358	0.000539186
208	1	2	21	23	11	12	60	12	20	10	11	82.69	229	0.715322	0.97167	0.143479	0.574107	0.592158	0.000912672	0.925217	0.00164362	0.000547198	193	0.733267	0.968541	0.166633	0.553012	0.544703	0.000884803	0.936523	0.00152051	0.000566948
209	2	3	37	28.6	14	15	57	13	12	14	13	78.57	258	0.72303	0.973679	0.13586	0.619115	0.596233	0.000966884	0.950434	0.00174207	0.000579289	224	0.723959	0.972494	0.166996	0.547294	0.519703	0.000923185	0.904244	0.00154203	0.000613763
210	1	2	31	36.4	10	12	61	15	18	14	13	76.92	265	0.710675	0.975433	0.127807	0.56758	0.619667	0.000967049	0.941208	0.00178182	0.000559665	189	0.730338	0.971588	0.19069	0.561145	0.490877	0.000887644	0.940275	0.00144882	0.000607055
211	2	3	23	27	14	14	60	11	18.5	14	9	77.08	254	0.711471	0.971173	0.165144	0.607246	0.58271	0.000919247	0.983446	0.00164135	0.000558196	184	0.722631	0.974366	0.214308	0.593645	0.487588	0.000887664	0.995436	0.00144334	0.000609828
212	1	2	28	30.8	14	13	61	13	19.5	13	10	79.31	240	0.70805	0.969639	0.169957	0.590202	0.514276	0.00100762	0.932533	0.00167823	0.000672311	114	0.746778	0.978035	0.25523	0.692155	0.456479	0.000862969	1.11993	0.0013626	0.000613155
213	1	1	36	34.8	12	12	55	14	26	6	9	83.33	271	0.697184	0.969586	0.164184	0.615461	0.570282	0.000886496	0.976955	0.00156725	0.000546121	195	0.745364	0.971835	0.197474	0.657183	0.557387	0.000832715	1.0631	0.00145639	0.000520875
214	2	3	20	16.6	13	13	64	14	20.5	12	11	87.5	224	0.72456	0.977289	0.173154	0.588653	0.563835	0.000882304	0.924373	0.00155043	0.00054824	224	0.716055	0.972676	0.175605	0.52497	0.523684	0.000881054	0.886742	0.00148364	0.000579762
215	1	1	34	15.4	16	13	62	14	18.5	12	9	70.83	272	0.68521	0.968634	0.150297	0.566088	0.558028	0.000924784	0.807396	0.00160805	0.00058315	191	0.726567	0.967538	0.184739	0.589463	0.522944	0.0008772	0.936582	0.00148203	0.000574784
216	2	2	40	34.8	12	14	53	12	24.5	14	15	87.5	261	0.71346	0.96922	0.135195	0.598098	0.624606	0.000861808	0.802538	0.0015893	0.000498064	219	0.7289	0.969786	0.177324	0.554069	0.516568	0.000848239	0.891219	0.00141821	0.000563252
217	1	2	36	23.6	12	12	38	8	23	6	4	73.61	248	0.732501	0.973203	0.135602	0.659045	0.639904	0.000949609	1.02851	0.00179028	0.000529271	271	0.741046	0.972747	0.162673	0.582539	0.568481	0.000895425	0.967178	0.00157527	0.000555501
