# Supplementary material for: Conduction velocity along a key white matter tract is associated with autobiographical memory recall ability
Source: eLife. 2022 Sep 27;11:e79303. doi: 10.7554/eLife.79303 (PMC9514844; doi:10.7554/eLife.79303)
Supplement: Supplementary file 2. [file elife-79303-supp2.xlsx]

## Sheet: PCB all and Figs S9, S10
	Basic demographic information			Autobiographical memory recall ability and control measure		Laboratory-based memory tests								Microstructure and physical parameters data from the parahippocampal cingulum bundle ROI												Data used in Figures S9 and S10 to plot the partial correlations with age, gender, scanner and the number of voxels in the ROI as covariates
Participant Number	Sex (1=Male, 2=Female)	Scanner (1, 2, 3)	Age (years)	Mean number internal details per memory	Mean number external details per memory	Mean immediate recall score of the Logical Memory test	Mean dealyed recall score of the Logical Memory test	Mean immediate recall score of the Rey Auditory Verbal Learning Test	Mean dealyed recall score of the Rey Auditory Verbal Learning Test	Mean dealyed recall score of the Rey–Osterrieth Complex Figure	Mean performance on the Warrington Recognition Memory Tests for Words	Mean performance on the Warrington Recognition Memory Tests for Faces	Mean performance on the Dead or Alive Test	Number of voxels in the parahippocampal cingulum bundle ROI	Parahippocampal cingulum bundle (weighted) mean MR g-ratio	Parahippocampal cingulum bundle (weighted) mean magnetisation transfer saturation	Parahippocampal cingulum bundle (weighted) mean orientation dispersion index (neurite coherence)	Parahippocampal cingulum bundle (weighted) mean neurite density	Parahippocampal cingulum bundle (weighted) mean isotropic volume fraction	Parahippocampal cingulum bundle (weighted) mean FA	Parahippocampal cingulum bundle (weighted) mean MD	Parahippocampal cingulum bundle (weighted) mean mean kurtosis	Parahippocampal cingulum bundle (weighted) mean Dpara	Parahippocampal cingulum bundle (weighted) mean Dperp		Internal details residuals	External details residuals	Parahippocampal cingulum bundle (weighted) mean FA residuals	Parahippocampal cingulum bundle (weighted) mean Dpara residuals
1	1	1	27	21.2	4.6	12	12	66	14	27	14	7	89.71	148	0.685421	0.969175	0.163825	0.500837	0.065114	0.519336	0.000964124	0.876549	0.00160889	0.000641741		-0.31031	-0.11688	0.57177	1.52418
2	1	1	30	22.2	6.6	17	17	63	15	28.5	12	5	85	121	0.636639	0.954873	0.206295	0.465648	0.00896643	0.466177	0.000896332	0.767997	0.00142506	0.000631967		-0.08013	0.37326	-0.1614	-0.92871
3	2	1	23	14.2	5.2	13	12	66	13	17.5	14	14	79.25	107	0.655607	0.95518	0.163717	0.468952	0.000965715	0.528343	0.000864716	0.690959	0.0014606	0.000566776		-1.29727	0.28433	1.04104	-0.23615
4	2	2	29	34.2	3.8	14	13	63	15	16	13	11	70.18	140	0.654449	0.96325	0.16841	0.429188	-0.00113067	0.453935	0.000885759	0.651737	0.00139336	0.000631956		1.26291	-0.45557	-0.38311	-1.13906
5	2	1	38	22.4	8.8	12	10	57	12	14	10	4	79.37	175	0.630476	0.971057	0.218862	0.517994	0.0177234	0.496868	0.000847326	0.773508	0.00138794	0.000577018		-0.58067	0.8183	0.00036	-1.15172
6	1	3	31	23.2	11.2	13	12	64	14	33	13	13	73.77	130	0.644221	0.958271	0.207027	0.511747	0.112476	0.438398	0.00101471	0.914218	0.00156761	0.000738254		-0.03357	1.69937	-0.20359	1.22237
7	1	3	30	27.6	4.2	12	12	55	13	25	14	12	81.97	132	0.676941	0.96257	0.175076	0.481236	0.0447354	0.47022	0.000946698	0.842855	0.00151144	0.000664326		0.57708	-0.48807	0.39631	0.36587
8	1	2	37	37	7.6	12	13	45	12	29	14	9	80.56	154	0.662832	0.963758	0.19421	0.49828	0.0289197	0.481975	0.000894861	0.77348	0.00143565	0.000624468		1.74971	0.35503	0.24767	-0.66985
9	2	3	32	27	8.6	15	14	71	15	27	13	11	92.65	125	0.644309	0.956863	0.152166	0.409167	0.0294225	0.433764	0.00098348	0.600751	0.00151678	0.000716832		0.28044	0.88353	-0.28157	0.86262
10	1	2	23	31.2	11	10	9	50	7	17.5	14	4	78.95	146	0.605121	0.963669	0.14181	0.404982	0.00866879	0.410365	0.000921866	0.449456	0.00138693	0.000689336		1.09811	2.04645	-1.38167	-1.76988
11	2	3	31	22.2	14.2	13	13	63	14	27	14	13	97.26	115	0.638892	0.955869	0.183868	0.506522	0.0460545	0.508179	0.000923043	0.852976	0.00152624	0.000621443		-0.33412	2.70702	1.29809	1.01657
12	1	2	33	32.4	6.4	13	14	69	15	26	14	12	82.86	148	0.702752	0.960387	0.161621	0.513206	0.0469752	0.533503	0.000917641	0.878639	0.00155193	0.000600498		1.17108	0.14352	1.2678	0.92574
13	1	3	36	23.6	1.2	15	16	58	13	33.5	14	15	95.65	124	0.557872	0.955843	0.251744	0.468101	0.0521693	0.393703	0.000972032	0.827747	0.00144609	0.000735001		0.00545	-1.712	-0.94359	-0.36222
14	1	1	32	31.4	6.6	12	13	67	15	30	14	11	87.5	153	0.644014	0.967299	0.202573	0.462211	0.0180204	0.470222	0.000922571	0.785953	0.00147524	0.000646237		1.04153	0.30542	-0.37014	-0.28849
15	1	2	27	30.8	7	16	16	56	14	29	14	13	89.71	130	0.67116	0.957936	0.177957	0.450043	0.0252995	0.459956	0.000959967	0.814604	0.0015154	0.000682249		1.07785	0.58615	-0.14248	0.29544
16	2	3	21	19.2	10	14	12	48	11	18.5	6	6	70	85	0.666212	0.951195	0.186791	0.509956	0.051905	0.501772	0.000924159	0.850103	0.00151871	0.000626882		-0.53579	1.78639	1.28352	0.7414
17	2	3	27	24	3.4	12	13	52	11	13.5	14	12	73.47	117	0.634176	0.94813	0.201787	0.456974	0.043247	0.440858	0.000989618	0.812562	0.00155022	0.000709318		-0.05892	-0.56113	-0.15373	1.23294
18	1	1	20	20	4.2	12	11	56	14	30.5	10	7	84.62	115	0.625418	0.945723	0.201281	0.439321	0.0459051	0.445847	0.000982462	0.684061	0.00151598	0.000715703		-0.27461	0.04137	-0.70258	0.11421
19	1	3	21	15.4	3	11	8	54	11	27	14	10	63.49	143	0.669784	0.957993	0.162116	0.433188	0.0193758	0.464293	0.000952596	0.739461	0.00151013	0.000673827		-1.08766	-0.47057	-0.01059	0.01905
20	1	2	30	17.8	6.6	13	14	49	12	18	12	8	77.19	124	0.599577	0.956091	0.25376	0.500257	0.0722753	0.393332	0.000953665	0.857278	0.00142057	0.000720213		-0.72632	0.32376	-1.36222	-0.96271
21	2	2	38	16.4	5.2	16	16	71	15	25	14	12	68.49	136	0.65994	0.959894	0.227861	0.459327	0.0443689	0.391306	0.000956082	0.778375	0.00141876	0.000724744		-1.26721	-0.405	-1.42663	-0.47506
22	1	1	22	22.6	3.6	16	17	61	15	25	14	12	65.57	90	0.595573	0.948596	0.256157	0.603585	0.135383	0.418877	0.000985155	0.972931	0.00149365	0.000730906		0.17752	-0.25272	-0.94911	-0.03141
23	2	2	35	23.6	8	13	12	55	13	11.5	13	11	86.44	80	0.659054	0.959401	0.172252	0.401294	0.00676135	0.393567	0.000943333	0.597547	0.00140168	0.000714162		0.00013	0.58481	-0.86384	-0.55207
24	1	2	24	28.4	2.4	15	16	68	15	32	13	12	82.09	114	0.692796	0.955151	0.152761	0.493487	0.0397056	0.518381	0.000932882	0.853272	0.0015521	0.00062327		0.83941	-0.75949	1.13852	0.81207
25	2	2	40	23.2	2	13	14	46	9	17.5	15	8	77.94	119	0.669711	0.959284	0.171055	0.460545	0.0201593	0.483017	0.000926944	0.774145	0.00149455	0.000643142		-0.26666	-1.52335	0.63096	0.76783
26	1	2	30	21.2	7.8	13	14	70	15	28	14	15	82.76	124	0.61134	0.959894	0.236139	0.496485	0.0725125	0.435776	0.000967153	0.870778	0.00149503	0.000703216		-0.25434	0.70645	-0.50877	0.11952
27	2	2	22	28.2	5	17	18	54	12	15.5	13	13	89.83	69	0.559474	0.950627	0.168757	0.42477	0.0016085	0.449573	0.000895855	0.602218	0.00140694	0.000640311		0.79674	0.18966	0.12306	-0.82259
28	2	2	32	37	3.2	14	15	63	15	31.5	14	13	92.86	137	0.666255	0.966428	0.182984	0.444422	0.0166216	0.429106	0.000941452	0.756633	0.00144646	0.000688947		1.6391	-0.77991	-0.79329	-0.26117
29	2	3	31	24.4	6.2	12	13	49	9	22.5	14	16	87.1	184	0.51683	0.974446	0.234187	0.437494	0.0185248	0.394084	0.000919004	0.646225	0.00136696	0.000695024		-0.32733	0.19799	-1.70523	-1.6229
30	2	3	31	20.6	5.8	13	14	53	15	22	12	10	78.72	137	0.62442	0.963697	0.1648	0.414221	0.00620948	0.460426	0.000924265	0.609005	0.00146055	0.000656121		-0.65144	0.04164	0.11179	-0.04163
31	2	1	36	28.6	4	15	13	53	10	16.5	12	8	88.71	171	0.641297	0.97231	0.179083	0.488198	0.0150608	0.50708	0.000890915	0.807634	0.0014733	0.000599724		0.31431	-0.62748	0.20801	0.0463
32	1	1	31	23.6	5.6	15	16	57	15	23.5	14	13	84.31	157	0.620142	0.960027	0.188413	0.469213	0.0156851	0.472129	0.000860358	0.562772	0.00137229	0.000604391		-0.05008	0.03268	-0.39232	-1.83426
33	2	1	22	34.6	6.2	14	13	61	14	27.5	13	10	77.55	131	0.680614	0.962302	0.163024	0.464023	0.0230704	0.503591	0.000928378	0.773368	0.00153588	0.000624625		1.43926	0.66166	0.27727	0.71455
34	1	1	23	14.4	2.2	11	11	65	12	25	13	8	61.02	111	0.618982	0.955403	0.20281	0.433642	0.020392	0.403648	0.000946394	0.695954	0.00142839	0.000705394		-1.06017	-0.73006	-1.45174	-1.048
35	2	2	30	36	11.2	13	14	64	13	23.5	14	16	88.71	138	0.66777	0.961762	0.131027	0.383065	0.00159486	0.458353	0.000984487	0.602297	0.00154904	0.000702212		1.51295	1.85943	-0.25431	1.16362
36	2	2	38	34.2	5.4	10	9	64	12	14	13	11	57.14	168	0.680082	0.974119	0.153695	0.485208	0.00499639	0.526899	0.00087307	0.759216	0.00146955	0.000574829		1.06528	-0.32162	0.97088	0.11274
37	2	3	33	28.2	3.4	14	14	57	13	14.5	14	15	72.73	157	0.60832	0.964385	0.180645	0.44734	0.0341263	0.439583	0.000969973	0.769789	0.00150678	0.000701571		0.30004	-0.79893	-0.47406	0.59751
38	1	2	32	14.6	1	14	11	68	15	27	14	11	89.04	166	0.612279	0.969376	0.204361	0.519569	0.0547017	0.463678	0.000918051	0.868039	0.00145195	0.000651102		-1.3693	-1.52385	-0.34059	-0.64274
39	1	3	24	19.2	3.2	10	10	41	8	20.5	14	15	94.74	105	0.653642	0.949877	0.207306	0.551551	0.116822	0.491274	0.00099955	0.941064	0.00161102	0.000693815		-0.42118	-0.56121	0.9807	1.75609
40	2	3	28	30.4	2.6	12	12	53	10	18	14	12	85.71	130	0.651413	0.955327	0.202235	0.478	0.0430123	0.461473	0.000952485	0.851208	0.0015202	0.000668626		0.76477	-0.85201	0.14657	0.76622
41	2	2	33	21.6	7.6	14	15	63	14	16.5	14	16	79.25	153	0.641749	0.966066	0.145246	0.411414	0.0180071	0.459614	0.0009751	0.655379	0.00154408	0.00069061		-0.57645	0.58938	-0.32491	1.11314
42	2	1	31	22.8	3.4	12	10	43	12	22	14	10	77.97	154	0.701364	0.962535	0.140887	0.471211	0.00543195	0.529477	0.000874091	0.679503	0.00147175	0.000575262		-0.3748	-0.61066	0.73603	-0.04964
43	2	1	28	32.8	1.6	15	13	67	14	16.5	12	6	62.12	58	0.66768	0.946881	0.146975	0.43448	0.000903298	0.445647	0.000890898	0.60171	0.00138871	0.000641993		1.45435	-1.11234	-0.02112	-0.89724
44	2	2	25	32.4	1.6	13	14	58	14	24	14	5	76.19	112	0.698673	0.955946	0.153193	0.437559	0.00105012	0.492822	0.00091351	0.703137	0.00148457	0.000627982		1.1682	-0.99946	0.60895	0.19544
45	2	2	31	28.4	4.6	14	13	64	14	24	10	6	82.09	147	0.69251	0.960866	0.156505	0.444475	0.00140559	0.492928	0.00090774	0.725235	0.00147827	0.000622473		0.41048	-0.28359	0.36781	0.12349
46	2	1	33	25.4	1.2	13	16	65	15	12	14	12	85.07	163	0.640222	0.964237	0.133289	0.467173	0.00660979	0.547338	0.000898043	0.731617	0.00154395	0.000575093		-0.06981	-1.39418	1.04148	1.01873
47	1	3	36	44	8.4	14	14	64	15	30	14	16	82.09	141	0.671475	0.959253	0.170625	0.507154	0.0716816	0.49595	0.000981425	0.849262	0.00160259	0.000670843		2.76379	0.59457	0.9376	1.83243
48	2	2	26	24.8	1.6	16	17	65	15	17	14	8	86.36	112	0.662373	0.956654	0.167707	0.422917	0.00367702	0.459572	0.000930167	0.680496	0.00146889	0.000660806		0.10468	-1.04317	-0.04019	-0.00171
49	2	3	26	16.6	1.6	11	9	65	15	32	10	7	87.5	146	0.648602	0.964268	0.237542	0.467111	0.0107514	0.405316	0.000855618	0.622754	0.00128376	0.000641547		-1.20319	-1.07369	-1.18585	-2.80694
50	1	2	33	16.4	3.2	14	14	56	15	17	7	7	92.86	83	0.65652	0.951998	0.226166	0.61404	0.1497	0.490267	0.000970095	1.03451	0.00157524	0.000667521		-0.76871	-0.91679	1.06649	1.57025
51	1	2	21	29.2	2.6	15	13	64	14	19	14	15	69.39	80	0.548312	0.941836	0.26827	0.523678	0.113828	0.306517	0.00101258	0.786938	0.00139627	0.00082074		1.1231	-0.58538	-2.83027	-1.38507
52	2	1	22	18.8	5	15	14	60	13	24	13	6	81.25	107	0.678632	0.960509	0.18512	0.451526	0.00298511	0.458229	0.00089399	0.7166	0.00141391	0.000634031		-0.65021	0.26427	-0.38817	-0.94546
53	2	1	21	21	2	16	17	67	14	28.5	14	10	91.94	120	0.703787	0.955584	0.105868	0.458569	0.00149818	0.602985	0.000883056	0.620961	0.00162156	0.000513804		-0.39257	-0.64079	2.36946	1.98087
54	1	1	28	16.8	3.4	14	16	65	13	28	13	13	91.18	149	0.562214	0.965649	0.237091	0.475855	0.0465871	0.429396	0.000952449	0.770124	0.00146821	0.000694571		-0.93394	-0.54268	-1.22755	-0.49461
55	1	3	27	26	14.2	11	8	52	13	20.5	13	12	88.57	125	0.565401	0.953639	0.263426	0.510987	0.0754312	0.424717	0.00095285	0.874598	0.00145844	0.000700053		0.41075	2.82791	-0.50491	-0.46353
56	2	3	32	27.6	4.8	13	14	60	14	23.5	13	15	82.35	95	0.711376	0.946774	0.19586	0.486847	0.0652166	0.461911	0.000971376	0.886806	0.00153268	0.000690723		0.49357	-0.34671	0.59272	1.23491
57	1	2	38	19.6	2.6	13	13	43	6	16	13	10	78.87	134	0.666082	0.961569	0.228439	0.496785	0.0586128	0.428385	0.000955932	0.853491	0.00146723	0.000700281		-0.58768	-1.29549	-0.60493	-0.08606
58	1	1	20	12.4	7	12	11	44	12	29.5	13	16	75.93	133	0.673301	0.959807	0.161455	0.514746	0.0163299	0.568082	0.000870425	0.837226	0.00152497	0.000543153		-1.40754	0.94534	1.57024	0.16023
59	1	1	27	16.4	3.8	14	14	65	15	27.5	13	10	75	92	0.692424	0.947129	0.164043	0.539441	0.0936497	0.539396	0.000961001	0.94649	0.00164229	0.000620355		-0.73428	-0.4063	1.55068	2.27296
60	2	2	23	24.2	2.6	14	13	61	11	21.5	10	8	88.52	139	0.604271	0.962189	0.166278	0.453951	0.0171911	0.45233	0.000912546	0.700076	0.00143191	0.000652863		-0.06998	-0.57658	-0.52155	-0.75814
61	1	1	31	26.4	12.6	14	13	59	9	11.5	7	7	84.62	115	0.614986	0.954978	0.194061	0.424341	0.0108515	0.460982	0.00095219	0.733021	0.00150253	0.000677019		0.52039	2.23933	-0.18478	0.25618
62	2	3	24	19.6	14.4	13	12	69	15	24.5	14	12	72	103	0.607266	0.953484	0.22838	0.47227	0.0302741	0.420178	0.000912122	0.756534	0.00140242	0.000666976		-0.58365	3.06947	-0.48389	-0.94153
63	2	3	22	22	4.2	9	9	57	14	17.5	14	15	76	122	0.656572	0.955796	0.176254	0.451747	0.0153119	0.475524	0.000935722	0.768913	0.00149869	0.000654239		-0.31572	-0.08435	0.39488	0.30706
64	1	3	28	38.2	7.4	16	17	62	14	28	14	15	72.88	155	0.579391	0.967575	0.259733	0.580953	0.0824109	0.433186	0.000891642	0.976732	0.00137638	0.000649273		1.96601	0.63397	-0.62355	-1.76669
65	1	3	21	26.4	1.8	14	13	63	15	29.5	14	14	69.39	79	0.637858	0.944611	0.239427	0.602537	0.0979682	0.460372	0.000896302	1.01861	0.00141828	0.000635312		0.71632	-0.89246	0.56835	-1.01504
66	2	1	31	21	7.4	15	14	61	14	23.5	14	15	89.23	112	0.660482	0.950504	0.149931	0.503396	0.0279119	0.5661	0.000888143	0.809943	0.0015438	0.000560314		-0.4429	0.63926	1.90408	1.19509
67	1	2	35	18.4	5.2	11	11	62	14	23	14	16	91.43	180	0.643534	0.972555	0.18654	0.452022	0.0220691	0.424455	0.00091818	0.695997	0.00140693	0.000673808		-0.92786	-0.30701	-1.21494	-1.2709
68	1	2	27	29.4	11.2	13	13	62	15	35	14	12	81.54	114	0.654359	0.957271	0.215134	0.462529	0.0155259	0.398257	0.000916046	0.809101	0.00136469	0.000691724		0.95274	1.91577	-1.21863	-1.81987
69	2	3	37	25.8	1.6	12	14	51	11	25	14	16	80.95	141	0.641142	0.956129	0.179761	0.433819	0.0105607	0.44035	0.000924683	0.661796	0.00143005	0.000671999		0.00214	-1.55763	-0.21657	-0.31971
70	1	2	22	18.8	4.6	14	14	66	14	24.5	14	7	68	133	0.620147	0.957544	0.174695	0.452307	0.0383816	0.488697	0.00096495	0.782803	0.00157644	0.000659206		-0.55849	0.04118	0.30758	1.01503
71	2	2	28	20.8	2.2	16	18	67	15	26	13	14	80	134	0.63768	0.958488	0.146293	0.419852	0.00665439	0.436145	0.000919016	0.551146	0.00142223	0.00066741		-0.5628	-0.92579	-0.69855	-0.72201
72	2	1	32	24.4	10	11	10	47	12	30	12	7	79.17	140	0.618236	0.963534	0.229095	0.510986	0.0473789	0.398142	0.000909383	0.768629	0.00135158	0.000688284		-0.10059	1.44186	-1.74146	-1.69972
73	2	3	28	29.2	11.2	15	16	59	15	15	14	14	84.51	156	0.586234	0.973848	0.202185	0.491023	0.0311692	0.453179	0.000911619	0.800155	0.00142663	0.000654115		0.48566	1.90654	-0.28743	-0.71611
74	2	3	29	28.2	5.6	11	10	61	13	23	12	14	79.41	155	0.658937	0.968646	0.168004	0.467153	0.0268778	0.484744	0.000931375	0.769754	0.00150042	0.000646853		0.34267	0.07631	0.37695	0.39179
75	1	2	32	25	7.6	14	13	66	15	19	14	12	94.52	112	0.655625	0.955703	0.17762	0.503874	0.0591484	0.506233	0.000963741	0.825977	0.00159154	0.000649842		0.30812	0.54789	1.07007	1.64006
76	2	3	23	26.4	1.4	15	16	62	14	29	13	13	76	125	0.677839	0.954463	0.183448	0.426624	0.00111091	0.444395	0.000938771	0.74655	0.0014643	0.000676005		0.27361	-1.01918	-0.24247	-0.17615
77	2	3	33	19.2	7.8	16	15	60	15	26	14	11	71.19	179	0.65334	0.968475	0.191001	0.497952	0.0408388	0.485458	0.000924369	0.787547	0.00149221	0.00064045		-1.04454	0.61775	0.22225	0.28229
78	2	1	37	21	5.2	12	11	55	9	14.5	12	9	71.19	144	0.673516	0.96702	0.20892	0.567386	0.0859879	0.498867	0.000916282	0.969181	0.00150449	0.000622176		-0.63236	-0.30504	0.33977	0.65738
79	2	3	38	30	1.4	12	12	66	14	17	14	4	86.15	109	0.675305	0.956097	0.166947	0.488754	0.0227527	0.511207	0.000896953	0.749616	0.00149251	0.000599175		0.71517	-1.68473	1.55649	0.76925
80	2	1	35	22.8	10.4	8	7	56	12	28	13	11	73.02	145	0.679328	0.959131	0.14051	0.48347	0.0136498	0.520577	0.000872877	0.697919	0.00145912	0.000579757		-0.36983	1.44134	0.72721	-0.06823
81	2	1	29	17.2	1.4	13	12	64	12	21	13	13	69.23	158	0.566088	0.963885	0.204584	0.445444	0.024904	0.424037	0.0009301	0.661005	0.00142055	0.000684874		-1.1525	-1.1586	-1.464	-0.87392
82	2	1	39	19.2	4.8	13	14	73	15	28	13	14	80.28	80	0.627068	0.952654	0.184574	0.477187	0.0118864	0.477776	0.000874576	0.728293	0.00141125	0.000606241		-0.62225	-0.55923	0.61226	-0.33564
83	2	2	33	23	9.8	12	11	56	13	20	14	15	83.33	163	0.663318	0.964845	0.212303	0.493172	0.0691365	0.474965	0.000951273	0.756106	0.00150941	0.000672206		-0.42538	1.29711	-0.11902	0.56213
84	1	3	29	24	3.4	15	14	66	14	15.5	13	14	92.96	131	0.670093	0.963729	0.215204	0.474563	0.0490565	0.432775	0.000958107	0.862546	0.00147558	0.000699368		0.09015	-0.70009	-0.36574	-0.18125
85	1	3	37	15	5	11	11	67	15	28	14	9	83.61	126	0.652626	0.95246	0.218593	0.583238	0.0925291	0.485085	0.000910239	0.998147	0.00147596	0.000627379		-1.20554	-0.54263	0.89271	0.09312
86	1	2	23	15.2	6.8	16	17	58	14	24	9	4	89.74	131	0.690621	0.958454	0.160237	0.493829	0.0334901	0.529307	0.000923945	0.860523	0.00156122	0.000605305		-1.05808	0.69784	1.16409	0.83402
87	2	1	20	14.4	2.2	14	14	48	10	8.5	14	10	75.56	128	0.694274	0.956927	0.15246	0.450742	0.00853876	0.508627	0.000910355	0.697131	0.00150224	0.00061441		-1.33491	-0.52839	0.37056	0.17838
88	2	2	33	29.8	4.6	15	17	62	14	28	14	11	86.49	153	0.61492	0.966859	0.219018	0.492477	0.0369092	0.444606	0.000916951	0.824266	0.00142206	0.000664399		0.56187	-0.36735	-0.62667	-0.66044
89	2	2	21	28.2	1.2	13	11	58	11	27	13	4	66.04	135	0.639225	0.962425	0.16509	0.470491	0.010702	0.511518	0.000904382	0.777226	0.00150126	0.00060594		0.5196	-0.93807	0.67088	0.20731
90	2	1	34	17.8	1.8	11	9	64	15	18.5	14	13	83.82	101	0.597926	0.95461	0.246371	0.486539	0.0290394	0.389457	0.000895301	0.817143	0.0013248	0.000680553		-0.865	-1.28452	-1.47645	-1.84427
91	2	3	32	17.4	4.2	14	12	67	15	24	14	12	79.31	99	0.598299	0.955711	0.214276	0.42302	0.0137805	0.395025	0.000937314	0.659762	0.00139363	0.000709157		-0.9397	-0.5356	-0.79328	-0.805
92	2	1	28	29.4	6.6	18	18	70	15	27	14	12	95.45	134	0.699496	0.963193	0.135454	0.476771	0.00517384	0.527327	0.000855722	0.628513	0.00144337	0.0005619		0.65345	0.52876	0.84013	-0.46016
93	2	3	22	16.2	4.2	14	12	57	13	15.5	9	11	84.21	40	0.573757	0.947299	0.285552	0.429802	0.0148404	0.328148	0.000932809	0.777163	0.00130927	0.00074458		-0.76599	-0.13457	-1.72568	-2.06054
94	2	2	20	20.2	2.6	11	10	47	8	19	12	11	85.71	108	0.657614	0.953557	0.207973	0.449541	0.0409023	0.398948	0.000980865	0.784288	0.00145918	0.00074171		-0.46561	-0.46441	-1.33451	-0.30814
95	1	3	35	26.6	6.8	13	13	60	12	27	13	15	94.52	167	0.666354	0.969603	0.178772	0.553946	0.0983412	0.502105	0.000952964	0.912414	0.00156317	0.00064786		0.24431	0.14395	0.77472	1.1066
96	1	3	24	16	8	16	16	57	15	22.5	9	7	82	107	0.612603	0.95338	0.201856	0.552212	0.100961	0.455387	0.000948504	0.934078	0.00149422	0.000675647		-0.87406	0.97079	0.23856	0.04901
97	2	2	21	27.8	3.8	12	10	57	12	24	14	11	73.81	81	0.692349	0.939421	0.1497	0.508057	0.0529616	0.516577	0.000929253	0.832215	0.00155561	0.000616075		0.69777	-0.14197	1.3276	1.25111
98	1	1	28	10.2	2	8	9	33	6	19.5	14	10	73.91	139	0.621343	0.965314	0.198928	0.436871	0.0253555	0.418888	0.00093035	0.519846	0.0014021	0.000694473		-1.80686	-0.99527	-1.33606	-1.40836
99	2	1	27	24	2.2	13	15	56	11	15.5	13	12	82.46	87	0.667213	0.943378	0.135132	0.416002	-0.00253656	0.501839	0.000891504	0.49572	0.00148335	0.00059558		0.11573	-0.85951	0.7913	0.31133
100	1	2	26	18	3.8	13	12	58	13	16	14	9	91.11	116	0.680308	0.955408	0.179049	0.543698	0.0595768	0.524216	0.000916831	0.931979	0.00154095	0.000604773		-0.62995	-0.39922	1.2741	0.70186
101	1	1	33	25.6	10.8	15	7	67	15	22	14	12	72.22	149	0.683887	0.968484	0.207313	0.556849	0.164746	0.418806	0.00104432	0.925615	0.00158214	0.000775407		0.24519	1.59868	-1.34346	1.31474
102	1	1	21	15.8	3	13	13	62	13	14	14	11	77.42	97	0.625374	0.957039	0.181074	0.375946	0.0114857	0.385052	0.00096274	0.462056	0.00141492	0.000736649		-0.78824	-0.39607	-1.72059	-1.23935
103	1	2	28	26.8	4	13	14	58	13	31	14	16	92.75	134	0.691774	0.955703	0.202519	0.483327	0.0216459	0.452575	0.00089951	0.828936	0.00141135	0.000643587		0.49676	-0.41185	-0.31258	-1.20499
104	2	1	31	38.4	4.4	14	15	61	15	19.5	13	15	75.71	137	0.606556	0.960985	0.185636	0.405122	0.0157824	0.441059	0.000928901	0.474112	0.0014448	0.000670949		1.86435	-0.30216	-0.86709	-0.36133
105	1	2	36	13.4	3.2	16	17	57	15	26	14	13	95.71	152	0.654763	0.966792	0.220756	0.593556	0.142674	0.463066	0.000977322	0.99539	0.00154826	0.000691855		-1.50927	-1.00569	-0.13139	0.94558
106	1	1	32	22	4.2	12	12	58	14	29	10	10	79.31	115	0.577141	0.948729	0.222003	0.424799	0.0834413	0.403693	0.00110496	0.695458	0.00167346	0.000820713		-0.09891	-0.48323	-1.3173	2.77123
107	2	1	30	16.6	4.2	10	8	67	13	13	14	10	87.5	165	0.642806	0.968423	0.200938	0.426226	0.0165082	0.445011	0.00095212	0.710507	0.00148689	0.000684732		-1.27459	-0.30508	-1.09482	0.0881
108	1	3	28	31.6	5.6	16	16	71	15	29	14	13	85.71	163	0.655479	0.968824	0.178667	0.523508	0.046906	0.540134	0.000912538	0.915197	0.0015593	0.000589156		1.01518	0.06483	1.44466	0.85439
109	1	1	24	26.6	4.2	15	16	63	15	33	12	15	66.13	128	0.674216	0.948102	0.139044	0.412889	-0.00180675	0.498498	0.000915913	0.60009	0.00149957	0.000624083		0.55135	-0.12554	0.3001	-0.06268
110	2	3	26	22.6	5.2	14	13	63	15	22.5	7	10	92.98	124	0.629889	0.958973	0.21199	0.419683	0.0142375	0.381167	0.000972792	0.770516	0.00142567	0.000746352		-0.27506	0.06092	-1.44532	-0.6409
111	1	2	34	35.6	5.4	12	13	64	14	20	9	15	86.76	158	0.631962	0.970995	0.215688	0.555628	0.0865845	0.452517	0.000929207	0.928811	0.00145623	0.000665695		1.56353	-0.21298	-0.44398	-0.48149
112	1	2	26	21.4	4.2	8	6	61	15	26	14	9	75	133	0.670205	0.956549	0.166644	0.403974	0.0440923	0.44147	0.00104442	0.746653	0.00162587	0.00075369		-0.23154	-0.26125	-0.56441	1.85622
113	1	2	33	25.4	13.2	10	9	55	14	27	14	5	95.52	145	0.693867	0.962804	0.196872	0.533035	0.0345242	0.504452	0.000872691	0.936482	0.00144018	0.000588948		0.21234	2.31028	0.7145	-0.68442
114	2	1	23	39.8	8.6	15	15	57	15	32	12	8	82	121	0.648611	0.959445	0.125306	0.428771	0.00864641	0.53541	0.000939871	0.670748	0.00159994	0.000609837		2.1959	1.3772	1.03925	1.7233
115	2	1	31	24	4.6	14	13	60	15	26.5	12	14	90.41	150	0.674717	0.960432	0.145757	0.458687	0.001441	0.507456	0.000873884	0.648805	0.00144062	0.000590518		-0.1909	-0.23042	0.33437	-0.48333
116	1	3	28	20.2	9.2	12	11	62	13	16.5	14	15	71.19	115	0.661604	0.950245	0.215336	0.477997	0.017644	0.424958	0.000906181	0.857087	0.00138457	0.000666987		-0.35962	1.18351	-0.37789	-1.45958
117	1	2	20	25.6	0.8	15	16	49	12	31	14	14	79.59	123	0.690975	0.956672	0.147784	0.478289	0.022178	0.55503	0.000927094	0.844351	0.00160576	0.000587758		0.44575	-1.08937	1.70531	1.42696
118	2	1	31	33.6	11.6	11	11	68	15	24	13	15	92.54	140	0.645334	0.966357	0.155283	0.397184	0.0013651	0.455595	0.000964669	0.646096	0.00151991	0.000687047		1.18504	1.99584	-0.60565	0.71622
119	1	1	34	19.6	3.6	10	11	47	10	28.5	13	15	94.12	164	0.59421	0.965947	0.197143	0.451545	0.0222142	0.434338	0.000933234	0.744519	0.00144681	0.000676447		-0.66113	-0.73201	-1.16591	-0.69208
120	2	3	20	22.4	4.4	13	10	57	12	23	14	7	75	121	0.678033	0.952734	0.128509	0.447361	0.0185817	0.511627	0.000940074	0.707034	0.00155706	0.00063158		-0.23887	0.06625	1.09227	1.09881
121	2	3	20	21.6	2	14	13	58	14	28	14	13	74.47	132	0.644739	0.963521	0.182315	0.436863	0.0290104	0.451815	0.000978819	0.776317	0.00153058	0.000702937		-0.39754	-0.6924	-0.22343	0.66229
122	1	2	26	37.8	2	16	13	61	12	18.5	13	13	91.3	119	0.673242	0.959188	0.182472	0.500779	0.0757896	0.461191	0.000971528	0.872102	0.00153772	0.000688432		2.10568	-0.97143	-0.024	0.64087
123	2	2	36	25	17.4	12	11	49	11	21	13	9	87.88	41	0.638144	0.964284	0.231136	0.477784	0.0354298	0.35547	0.000924214	0.838959	0.00132609	0.000723278		0.35477	3.51497	-1.20962	-1.43668
124	2	3	31	13.8	5.4	15	15	63	15	24	13	6	69.57	144	0.539654	0.956763	0.262186	0.454422	0.0353645	0.373072	0.000954284	0.805585	0.0013936	0.000734625		-1.6257	-0.08164	-1.71662	-1.04767
125	1	3	29	22	7.8	11	10	61	14	28	14	13	76.32	153	0.647853	0.96204	0.188782	0.5293	0.0596265	0.495865	0.0009257	0.915648	0.00151345	0.000631823		-0.2827	0.71659	0.67672	0.26571
126	1	3	28	14.8	2	8	9	47	12	18	14	13	91.67	92	0.651817	0.945274	0.194806	0.475049	0.0341515	0.463963	0.000937493	0.863735	0.00148949	0.000661496		-1.0097	-1.12673	0.64279	0.1735
127	2	2	31	21.8	6.6	13	12	61	12	14	14	11	73.85	137	0.595448	0.964692	0.165784	0.371562	0.00739858	0.429654	0.0010118	0.602806	0.00155451	0.00074045		-0.46245	0.34811	-0.80168	1.27864
128	1	2	37	16.8	3	10	7	48	10	16.5	12	5	75	164	0.648071	0.971892	0.183065	0.474197	0.0311073	0.457012	0.000932097	0.816576	0.00146772	0.000664287		-1.09772	-1.10584	-0.35705	-0.25075
129	2	2	20	15.8	2.8	11	10	48	9	20.5	13	4	78.72	101	0.667262	0.953148	0.162237	0.448163	0.0137708	0.470013	0.00092784	0.73126	0.00147836	0.000652582		-1.04612	-0.40492	0.16636	0.00354
130	2	3	31	24.2	9.2	13	11	66	13	21	13	6	90.77	136	0.608162	0.960024	0.23545	0.483232	0.0467077	0.415312	0.000937454	0.809599	0.0014156	0.000698383		-0.14736	1.12533	-0.78506	-0.69037
131	2	2	20	26.8	4.6	14	15	58	14	27	13	9	67.35	132	0.647268	0.9604	0.179356	0.507483	0.0329663	0.529249	0.000914034	0.877454	0.00154566	0.000598222		0.34673	0.18811	1.03883	0.83594
132	1	3	24	10.2	2	13	12	66	15	25	13	14	81.48	115	0.686045	0.951424	0.174902	0.438876	0.0183555	0.445767	0.000961948	0.805583	0.00149748	0.000694185		-1.71383	-0.93778	-0.03709	0.05876
133	2	1	21	28.6	2	16	17	65	15	26	13	14	76.67	128	0.653751	0.961729	0.162057	0.44671	0.00253014	0.517737	0.000875289	0.605345	0.0014701	0.000577883		0.62783	-0.63589	0.57313	-0.25813
134	2	2	23	27.2	10.2	14	15	68	15	27	14	11	87.5	121	0.65604	0.964048	0.167789	0.50216	0.0667526	0.510762	0.000965847	0.849297	0.00159757	0.000649984		0.42438	1.83612	0.83837	1.73429
135	2	1	30	37.4	3.8	16	14	66	15	25.5	14	14	93.06	135	0.696468	0.954486	0.152524	0.474739	0.00634133	0.527039	0.000880197	0.73718	0.00148073	0.000579928		1.74268	-0.45101	0.86288	0.13962
136	1	3	41	22	10.4	12	10	57	12	13	10	3	89.71	162	0.690721	0.963172	0.196535	0.548912	0.0508011	0.515763	0.000881774	0.943566	0.00146862	0.000588351		-0.42359	1.02667	1.21718	-0.06008
137	1	3	34	28.2	7.8	14	15	56	13	18	9	13	91.04	120	0.542689	0.956688	0.249291	0.545783	0.085397	0.388439	0.000940995	0.868344	0.00139308	0.000714953		0.67832	0.4778	-1.04714	-1.17533
138	2	3	25	15.2	7.2	11	10	62	14	26	14	4	81.25	110	0.510969	0.952655	0.275927	0.414988	0.0385506	0.307351	0.000992727	0.62043	0.00136022	0.000808982		-1.23324	0.73388	-2.80508	-1.5571
139	1	1	33	21.2	3.4	9	11	50	14	19.5	7	11	84	166	0.585752	0.968865	0.217329	0.506237	0.0838369	0.417125	0.000977937	0.848879	0.00147782	0.000727998		-0.43918	-0.75085	-1.55199	-0.28148
140	2	1	35	19.4	8.2	13	14	69	15	29	14	15	78.69	129	0.674607	0.957269	0.182428	0.440018	0.00779567	0.428181	0.000919838	0.721193	0.00140925	0.000675132		-0.77257	0.72994	-0.96619	-0.71778
141	2	2	34	17.8	3	15	15	72	15	25.5	13	13	95.65	130	0.671742	0.958904	0.217158	0.489148	0.020601	0.440208	0.000878073	0.761818	0.00135599	0.000639113		-1.01292	-0.93541	-0.45931	-1.48185
142	2	3	20	15.4	2	13	12	49	10	28	13	11	80.43	99	0.670058	0.95483	0.144991	0.458606	0.00852865	0.50837	0.000924066	0.756237	0.00152592	0.000623137		-1.1154	-0.71261	1.2529	0.74969
143	1	1	30	25.2	14.4	12	13	57	13	28	14	4	91.3	143	0.676463	0.955321	0.1398	0.505045	0.0417252	0.563065	0.000915774	0.801345	0.00160383	0.000571745		0.24112	2.87424	1.56066	1.56621
144	1	3	31	32	2	14	15	65	15	26.5	14	16	92.96	140	0.677988	0.957344	0.14862	0.450557	0.025259	0.483858	0.000969115	0.782082	0.00156024	0.000673554		1.14476	-1.22849	0.6077	1.06819
145	2	3	21	17.8	3	18	19	63	13	25	14	11	73.81	91	0.649901	0.952758	0.226397	0.460134	0.00842325	0.42162	0.000880402	0.720891	0.00134061	0.0006503		-0.7561	-0.44231	-0.38979	-1.87549
146	2	2	28	21.2	2	12	12	68	15	18	14	13	74.42	149	0.636979	0.965468	0.150442	0.40526	0.00769061	0.467554	0.00096548	0.657316	0.00153551	0.000680466		-0.57219	-0.98038	-0.22117	0.85395
147	2	2	26	43.2	7	13	14	68	15	26.5	14	8	79.1	111	0.637228	0.95614	0.194259	0.444179	0.0276958	0.428377	0.000960407	0.793786	0.00147424	0.000703493		2.66327	0.67833	-0.65717	0.08069
148	1	1	21	11.2	4.8	12	12	60	15	20	13	11	77.94	93	0.389146	0.940192	0.340512	0.432644	0.118583	0.208482	0.00111049	0.679577	0.0013717	0.000979883		-1.4095	0.17552	-5.22983	-1.84878
149	2	3	36	14.4	2.2	11	11	42	9	24	13	8	92.5	137	0.601866	0.963414	0.220034	0.487062	0.0848189	0.403207	0.00100029	0.861612	0.0014914	0.000754735		-1.55459	-1.32502	-0.9417	0.56012
150	2	1	21	27.2	2.4	13	14	55	11	35	13	8	78.57	106	0.694405	0.956502	0.124592	0.452882	0.0035117	0.566104	0.000921913	0.753851	0.00161018	0.000577782		0.52869	-0.5218	1.77178	1.88122
151	1	2	40	18	6.2	9	7	61	10	12	13	18	90.14	86	0.684814	0.943008	0.182497	0.537427	0.0788749	0.490391	0.000951608	0.960466	0.00154193	0.000656446		-0.61905	-0.26424	1.174	1.28675
152	2	3	35	19.6	4.2	13	11	55	10	13.5	12	15	83.02	139	0.665138	0.959629	0.212023	0.541502	0.0843405	0.459805	0.000942763	0.925107	0.00148933	0.00066948		-0.83289	-0.64226	0.15636	0.4899
153	2	2	24	31.8	6.2	13	14	54	14	20	13	11	77.94	128	0.674273	0.959121	0.138597	0.407039	0.00341114	0.446776	0.000954311	0.639192	0.00148547	0.00068873		1.02416	0.52105	-0.50075	0.10273
154	1	3	25	15.6	6.2	12	10	65	15	24	12	8	79.59	87	0.613848	0.952258	0.232948	0.483346	0.0402046	0.397371	0.000928968	0.824483	0.00138525	0.000700827		-0.85152	0.34078	-0.70303	-1.41003
155	1	2	21	22.2	2.8	11	11	57	14	26.5	14	12	75	123	0.644096	0.95016	0.177038	0.493757	0.028903	0.494042	0.000909877	0.862714	0.0014877	0.000620968		-0.03473	-0.49527	0.49841	-0.25845
156	1	1	28	13	4.2	13	12	60	13	26.5	14	16	66.04	115	0.67967	0.954491	0.15174	0.433802	0.00757605	0.473129	0.000918403	0.666563	0.00146803	0.000643588		-1.3143	-0.30837	0.00125	-0.33729
157	1	2	31	22.2	7.2	12	10	48	9	19.5	13	8	94.29	122	0.604485	0.958865	0.325016	0.756687	0.15638	0.403806	0.000905787	1.22563	0.0013685	0.000674432		-0.11536	0.47016	-1.11165	-1.67947
158	2	1	25	23	9.6	11	9	72	15	21.5	14	12	72.09	161	0.635458	0.964614	0.156243	0.425441	0.00181566	0.453037	0.000883527	0.49836	0.00138634	0.000632119		-0.32636	1.63317	-0.98934	-1.50798
159	1	3	33	22	8.8	6	7	52	9	16.5	3	4	76.06	132	0.696172	0.957024	0.215764	0.552537	0.0552124	0.453896	0.00088599	0.86175	0.0013891	0.000634435		-0.22579	0.84777	0.12629	-1.32026
160	1	2	33	28	7.6	15	15	61	14	25.5	14	7	92.31	143	0.650945	0.966237	0.229231	0.553574	0.0725479	0.425185	0.000902503	0.911153	0.00137231	0.0006676		0.58192	0.52316	-0.8588	-1.66143
161	2	1	32	25.4	1	15	16	51	13	16.5	14	16	82.26	140	0.685049	0.966305	0.116518	0.449866	0.00511858	0.527777	0.000880052	0.550236	0.00148253	0.000578813		0.03823	-1.42833	0.86514	0.20353
162	1	3	20	25.6	6.4	15	15	66	14	28	14	8	87.8	124	0.598133	0.952674	0.227227	0.505815	0.0509077	0.424224	0.000922448	0.863965	0.00141202	0.000677662		0.41901	0.6458	-0.6404	-1.34832
163	1	3	29	21.4	5.8	11	11	41	10	21	14	13	67.16	154	0.657161	0.965773	0.137661	0.460883	0.0213549	0.507091	0.000926507	0.690251	0.00152761	0.000625953		-0.37032	0.07938	0.89216	0.46682
164	2	2	37	11.8	3	8	8	57	7	14	14	9	58.21	159	0.664245	0.969025	0.132072	0.457148	0.00865945	0.508786	0.000896961	0.636087	0.00147809	0.000606397		-1.99682	-1.0488	0.67977	0.24845
165	1	1	35	41.8	6.4	12	12	64	15	14	14	10	81.54	161	0.709951	0.963169	0.184701	0.52539	0.0450165	0.530992	0.000900737	0.914374	0.00152053	0.000590839		2.42514	0.11539	0.82778	0.42427
166	2	1	20	4.6	2.6	10	11	59	13	10	4	11	86.84	138	0.619819	0.966883	0.205294	0.480624	0.0222785	0.442658	0.000889222	0.740319	0.00137774	0.000644961		-2.73861	-0.3947	-1.05868	-1.67819
167	1	2	24	22.8	4.2	14	14	60	15	30	13	10	66.07	139	0.592568	0.959067	0.192568	0.417686	0.0380802	0.394202	0.00100841	0.737701	0.0015025	0.000761358		-0.04617	-0.17014	-1.61532	-0.02642
168	1	3	32	37.6	7.8	12	13	59	12	18.5	14	16	92.54	129	0.635102	0.958231	0.208165	0.53802	0.0818749	0.488665	0.000955293	0.913928	0.00154158	0.000662147		1.96126	0.57074	0.83682	0.87945
169	2	1	29	30	9.4	11	10	56	11	13.5	12	15	74.63	147	0.645271	0.969978	0.125637	0.443955	0.00894883	0.531553	0.000888962	0.520074	0.00150441	0.000581237		0.67198	1.38595	0.81092	0.39665
170	1	3	32	16.8	7.4	14	15	66	15	28.5	12	12	79.69	120	0.652804	0.960414	0.211327	0.466839	0.0354737	0.406381	0.000936783	0.819767	0.00141319	0.000698578		-0.88722	0.43767	-0.72519	-0.94435
171	2	3	35	30.2	8.4	13	13	70	15	23	10	11	74.19	163	0.590718	0.969212	0.205328	0.415217	0.0130765	0.427831	0.000974223	0.740644	0.00149628	0.000713193		0.53472	0.71186	-0.73322	0.47814
172	1	3	37	18.8	3.4	13	10	48	11	21	12	13	76.47	126	0.682265	0.959506	0.212438	0.612076	0.115338	0.511718	0.000926172	1.03516	0.00154146	0.000618528		-0.67803	-1.05288	1.42822	1.04516
173	2	3	25	29.8	1.8	15	13	65	15	28.5	12	13	88.68	120	0.704116	0.956187	0.203363	0.588303	0.102947	0.491175	0.000924846	0.976194	0.00150456	0.000634986		0.75024	-0.98211	0.78836	0.4939
174	1	1	25	27.6	3.8	12	12	46	9	24	14	11	76.12	127	0.719822	0.94861	0.153556	0.51509	0.0461746	0.545203	0.000913835	0.899276	0.00155668	0.000592412		0.686	-0.29743	1.2689	0.80274
175	1	3	37	25.8	4	18	15	58	15	26	13	14	96.77	149	0.641753	0.964099	0.210659	0.551638	0.0874012	0.451936	0.000933243	0.941035	0.00146518	0.000667276		0.19417	-0.84745	-0.01022	-0.17175
176	2	3	28	13.8	2.8	15	15	70	14	25.5	13	11	93.55	127	0.684387	0.957685	0.213984	0.626118	0.112907	0.497738	0.000936124	0.989799	0.00153189	0.00063824		-1.52664	-0.79007	0.9066	0.95025
177	1	1	24	16.2	6.2	8	6	45	7	27	14	15	90.14	118	0.68665	0.951465	0.165001	0.479212	0.0130313	0.531223	0.000891195	0.772197	0.00150278	0.000585401		-0.84909	0.50616	1.0609	0.03099
178	1	1	31	34	4.6	12	11	56	13	22.5	13	15	89.86	154	0.663236	0.961571	0.172058	0.544882	0.0676677	0.552888	0.000937767	0.865649	0.0016261	0.000593602		1.40662	-0.28807	1.26236	1.86878
179	1	2	27	23.4	6.4	17	17	69	13	21	14	13	81.69	96	0.672337	0.953433	0.215989	0.477359	0.0340658	0.458032	0.000929256	0.837115	0.0014579	0.000664933		0.19773	0.37398	0.16829	-0.38047
180	1	2	23	15.2	1.2	10	9	55	10	12	7	4	76.6	133	0.645413	0.960367	0.133752	0.441248	-0.000130363	0.4843	0.000858559	0.461848	0.00138935	0.000593165		-1.06673	-1.08683	0.23856	-1.67355
181	2	2	22	33.4	0.8	14	15	52	11	22	14	10	74.42	149	0.679857	0.961864	0.149543	0.460535	0.0151745	0.536849	0.00093293	0.790685	0.00158508	0.000606853		1.17237	-1.10078	1.05573	1.39043
182	1	3	35	14.4	5.4	8	7	55	13	15.5	10	8	78.79	107	0.66787	0.951919	0.204982	0.489262	0.0483691	0.460011	0.000948872	0.838738	0.00150492	0.000670847		-1.18961	-0.33926	0.54501	0.54205
183	2	1	23	25.8	2.2	13	12	65	15	17	14	6	71.19	113	0.68823	0.958259	0.162793	0.502585	0.0495325	0.518682	0.000923147	0.777938	0.00153897	0.000615233		0.28706	-0.66873	0.78511	0.87479
184	2	3	27	24.4	5.8	10	10	54	12	14	12	12	65.08	106	0.550761	0.952061	0.269654	0.462774	0.035313	0.383702	0.00093549	0.779284	0.00138353	0.000711467		0.04422	0.19752	-1.18994	-1.13803
185	2	3	32	35.2	13	16	16	57	11	12.5	14	10	82.46	148	0.649663	0.958007	0.153344	0.439345	0.00949384	0.492794	0.000937393	0.730708	0.00152909	0.000641542		1.31922	2.30082	0.66897	0.93353
186	2	1	37	18	10.4	15	16	67	15	16	14	10	79.66	129	0.581139	0.95949	0.230482	0.426072	0.0148091	0.400638	0.000932087	0.663722	0.00138845	0.000703903		-0.9839	1.34411	-1.48119	-0.95867
187	2	2	33	18.2	0.8	14	14	53	14	15	14	10	68.57	140	0.681801	0.964963	0.170319	0.505025	0.0125539	0.525566	0.000855713	0.732797	0.00144017	0.000563485		-0.99217	-1.58717	1.13483	-0.33606
188	1	1	31	22.8	8	11	11	62	13	24.5	14	13	89.86	129	0.653677	0.961756	0.193724	0.542074	0.0700413	0.50487	0.000922665	0.865973	0.00152671	0.000620644		-0.03995	0.78092	0.55381	0.54174
189	1	3	28	25.4	7	10	10	53	15	29	13	15	86.27	151	0.651703	0.966639	0.230164	0.520525	0.0876716	0.433978	0.000966202	0.909738	0.00149377	0.000702416		0.20644	0.50395	-0.56651	-0.0416
190	1	1	39	31.4	5.4	11	9	41	8	11.5	6	4	86.96	117	0.71181	0.957805	0.193708	0.521831	0.0552457	0.50622	0.000920467	0.885331	0.0015182	0.0006216		1.13786	-0.40533	0.85954	0.71995
191	1	3	35	19.8	7.2	13	12	56	11	26	12	13	86.11	91	0.656998	0.956959	0.187642	0.492111	0.061404	0.457267	0.000957469	0.833248	0.00151527	0.00067857		-0.37075	0.22498	0.65427	0.76762
192	1	1	31	10.6	5.6	11	9	51	13	21.5	14	11	95.24	158	0.639772	0.96842	0.200746	0.45497	0.0203426	0.461409	0.000936575	0.795991	0.00148805	0.000660836		-1.85905	0.03329	-0.61815	-0.15643
193	1	3	24	38.4	5.8	12	10	48	9	8.5	8	11	83.87	95	0.665312	0.954112	0.215878	0.505807	0.0438782	0.476099	0.000914237	0.863877	0.00147636	0.000633175		2.28742	0.26183	0.77835	-0.15411
194	1	1	38	17	8.4	13	13	48	8	25	14	14	78.87	145	0.659707	0.965195	0.1818	0.458431	0.0116789	0.476017	0.000913752	0.778353	0.00146592	0.000637666		-0.97381	0.61226	-0.05495	-0.20221
195	1	1	39	18.4	1.8	11	9	66	12	18.5	12	12	77.61	141	0.664392	0.958081	0.198245	0.533114	0.041119	0.478046	0.000882756	0.825921	0.00142084	0.000613715		-0.77065	-1.53871	0.04635	-0.80803
196	2	3	31	35.8	9	14	12	57	13	19.5	13	12	79.66	161	0.653981	0.969777	0.170132	0.454036	0.0132916	0.48533	0.000913514	0.724363	0.00148322	0.000628663		1.35474	1.07685	0.36586	0.17491
197	2	1	22	44.6	6.4	14	13	60	12	22.5	13	7	74	119	0.688704	0.957245	0.128457	0.478286	0.0143518	0.557963	0.000905793	0.772285	0.00157722	0.000570081		2.87939	0.71809	1.49389	1.37178
198	1	3	30	18.2	2.4	11	7	63	10	24	14	14	84.91	132	0.693488	0.958605	0.177285	0.541569	0.0729178	0.497656	0.000919654	0.900982	0.00150836	0.000625303		-0.72782	-1.0621	0.94796	0.32103
199	1	3	23	18	2.2	12	11	69	15	20	14	10	74.07	139	0.586713	0.958583	0.188108	0.427007	0.0223658	0.428464	0.000966015	0.73535	0.00148448	0.000706782		-0.72641	-0.81558	-0.65109	-0.27367
200	2	2	35	24.2	3.6	14	14	66	15	26.5	13	7	68.97	114	0.688574	0.956488	0.142121	0.423445	0.00590174	0.465562	0.000927165	0.631632	0.00146704	0.00065723		-0.06372	-0.79757	0.23434	0.23804
201	1	1	28	30.6	3.4	12	12	52	12	13.5	13	10	85.92	156	0.644933	0.964323	0.185582	0.535071	0.0476574	0.535708	0.000894244	0.920687	0.00153087	0.00057593		0.95147	-0.53839	0.83816	0.38328
202	1	1	20	21.8	3.8	12	10	58	15	22.5	14	16	86.84	115	0.657941	0.959646	0.145086	0.444946	0.0260243	0.500971	0.000973174	0.755175	0.001596	0.00066176		-0.02474	-0.0862	0.40583	1.27731
203	1	1	29	17	5.8	11	8	50	10	17	12	10	86.15	116	0.680437	0.954141	0.125972	0.474832	0.00476043	0.541957	0.000870285	0.656712	0.00148264	0.000564107		-0.77185	0.15879	1.39432	-0.09895
204	2	2	35	28	3	13	12	54	9	23	14	8	79.71	171	0.643838	0.971208	0.163692	0.435292	0.00569048	0.485062	0.000895801	0.550606	0.00145558	0.000615912		0.2171	-0.95402	0.0406	-0.19649
205	1	3	30	28.6	3.4	12	10	56	12	25.5	12	12	86.96	27	0.604032	0.933198	0.262015	0.435119	0.0458286	0.389997	0.000998513	0.839821	0.00148149	0.000757022		1.17032	-0.80749	-0.1376	0.42432
206	2	2	21	32.2	2.6	15	15	60	14	21.5	14	11	69.7	142	0.672437	0.957102	0.190884	0.49096	0.0245071	0.475572	0.000904986	0.820531	0.00145063	0.000632163		1.04458	-0.48731	-0.12385	-0.56154
207	1	1	27	18.4	3.4	14	14	64	13	21.5	7	9	82.54	167	0.654696	0.970126	0.198325	0.487485	0.00738699	0.509415	0.000866153	0.795254	0.00144164	0.000578407		-0.78123	-0.48794	0.177	-0.99598
208	1	2	21	23	2.8	11	12	60	12	20	10	11	82.69	125	0.680087	0.957569	0.164173	0.467354	0.0257978	0.509391	0.000944221	0.814708	0.00156581	0.000633425		0.06767	-0.49404	0.78648	0.86757
209	2	3	37	28.6	4.8	14	15	57	13	12	14	13	78.57	164	0.687137	0.967865	0.167944	0.475033	0.0201204	0.481505	0.000915116	0.81372	0.00147624	0.000634555		0.29129	-0.52303	0.37457	0.24346
210	1	2	31	36.4	7.2	10	12	61	15	18	14	13	76.92	130	0.654503	0.955816	0.202797	0.481632	0.0557274	0.438412	0.000958295	0.853512	0.00148097	0.00069696		1.82125	0.47506	-0.49804	-0.0824
211	2	3	23	27	7.2	14	14	60	11	18.5	14	9	77.08	140	0.67985	0.959375	0.198849	0.492998	0.0448315	0.463336	0.000935318	0.878493	0.00147673	0.000664611		0.29198	0.83969	-0.01578	-0.06603
212	1	2	28	30.8	3	14	13	61	13	19.5	13	10	79.31	133	0.635998	0.957534	0.181717	0.519041	0.0291342	0.478244	0.000874234	0.720723	0.0014065	0.000608099		1.05637	-0.73137	0.21382	-1.27082
213	1	1	36	34.8	11.2	12	12	55	14	26	6	9	83.33	145	0.680944	0.962755	0.204274	0.516697	0.0334826	0.471418	0.000883187	0.857555	0.00141136	0.000619102		1.51416	1.59265	-0.18624	-1.05664
214	2	3	20	16.6	2.2	13	13	64	14	20.5	12	11	87.5	125	0.606914	0.958599	0.216995	0.447999	0.0466938	0.439935	0.000979335	0.777498	0.00151489	0.000711555		-1.06134	-0.6329	-0.39037	0.46714
215	1	1	34	15.4	4.2	16	13	62	14	18.5	12	9	70.83	143	0.663715	0.963353	0.160125	0.442712	0.00881148	0.45748	0.000901612	0.572259	0.00141723	0.000643802		-1.15329	-0.55352	-0.48476	-1.02322
216	2	2	40	34.8	12.2	12	14	53	12	24.5	14	15	87.5	141	0.659944	0.9618	0.169049	0.48813	0.0139001	0.484111	0.000874277	0.776544	0.0014131	0.000604864		1.24843	1.74301	0.42684	-0.51939
217	1	2	36	23.6	5	12	12	38	8	23	6	4	73.61	127	0.706377	0.951107	0.186213	0.545317	0.0830025	0.488961	0.000950256	0.93946	0.00154171	0.000654528		0.01488	-0.44696	0.64624	0.96801
